## 34 Main

35 Mitochondrial ATP synthase consists of the soluble F<sub>1</sub> and membrane-bound F<sub>o</sub> subcomplexes,  
36 and occurs in dimers that assemble into oligomers to induce the formation of inner-membrane  
37 folds, called cristae. The cristae are the sites for oxidative phosphorylation and energy  
38 conversion in eukaryotic cells. Dissociation of ATP synthase dimers into monomers results in  
39 the loss of native cristae architecture and impairs mitochondrial function<sup>1,2</sup>. While cristae  
40 morphology varies substantially between organisms from different lineages, ranging from flat  
41 lamellar in opisthokonts to coiled tubular in ciliates and discoidal in euglenozoans<sup>3</sup>, the  
42 mitochondrial ATP synthase dimers represent a universal occurrence to maintain the  
43 membrane shape<sup>4</sup>.

44 ATP synthase dimers of variable size and architecture, classified into types I to IV have  
45 recently been resolved by high-resolution cryo-EM studies. In the structure of the type-I ATP  
46 synthase dimer from mammals, the monomers are only weakly associated<sup>5,6</sup>, and in yeast  
47 insertions in the membrane subunits form tighter contacts<sup>7</sup>. The structure of the type-II ATP  
48 synthase dimer from the alga *Polytomella* sp. showed that the dimer interface is formed by  
49 phylum-specific components<sup>8</sup>. The type-III ATP synthase dimer from the ciliate *Tetrahymena*  
50 thermophila is characterized by parallel rotary axes, and a substoichiometric subunit, as well  
51 as multiple lipids were identified at the dimer interface, while additional protein components  
52 that tie the monomers together are distributed between the matrix, transmembrane, and luminal  
53 regions<sup>9</sup>. The structure of the type-IV ATP synthase with native lipids from *Euglena gracilis*  
54 also showed that specific protein-lipid interactions contribute to the dimerization, and that the  
55 central and peripheral stalks interact with each other directly<sup>10</sup>. Finally, a unique apicomplexan  
56 ATP synthase dimerises via 11 parasite-specific components that contribute ~7000 Å<sup>2</sup> buried  
57 surface area<sup>11</sup>, and unlike all other ATP synthases, that assemble into rows, it associates in  
58 higher oligomeric states of pentagonal pyramids in the curved apical membrane regions.  
59 Together, the available structural data suggest a diversity of oligomerisation, and it remains  
60 unknown whether common elements mediating these interactions exist or whether  
61 dimerization of ATP synthase occurred independently and multiple times in evolution<sup>4</sup>.

62 The ATP synthase of *Trypanosoma brucei*, a representative of kinetoplastids and established  
63 medically important model organism causing the sleeping sickness, is highly divergent,  
64 exemplified by the pyramid-shaped F<sub>1</sub> head containing a phylum specific subunit<sup>12,13</sup>. The  
65 dimers are sensitive to the lack of cardiolipin<sup>14</sup> and form short left-handed helical segments  
66 that extend across the membrane ridge of the discoidal cristae<sup>15</sup>. Uniquely among aerobic  
67 eukaryotes, the mammalian life cycle stage of *T. brucei* utilizes the ATP synthase as a proton  
68 pump maintaining the mitochondrial membrane potential at the expense of ATP<sup>16,17</sup>, whereas  
69 the insect stage of the parasite employs the forward ATP-producing mode of the enzyme<sup>18,19</sup>.

70 Given the conservation of the core subunits, the different nature of oligomerisation and the  
71 ability to test structural hypotheses biochemically, we reasoned that investigation of the *T.*  
72 *brucei* ATP synthase structure and function would provide the missing evolutionary link to  
73 understand how the monomers interact to form physiological dimers. Here, we address this  
74 question by combining structural, functional and evolutionary analysis of the *T. brucei* ATP  
75 synthase dimer.

## 76 Results

### 77 Cryo-EM structure of the *T. brucei* ATP synthase

78 We purified ATP synthase dimers from cultured *T. brucei* procyclic trypomastigotes by affinity  
79 chromatography with a recombinant natural protein inhibitor TbIF<sub>1</sub><sup>20</sup>, and subjected the sample  
80 to cryo-EM analysis (Supplementary Fig. 1 and 2). Using masked refinements, maps were  
81 obtained for the membrane region, the rotor, and the peripheral stalk. To describe the  
82 conformational space of the *T. brucei* ATP synthase, we resolved 10 distinct rotary substates,  
83 which were refined to 3.5-4.3 Å resolution. Finally, particles with both monomers in rotational  
84 state 1 were selected, and the consensus structure of the dimer was refined to 3.2 Å resolution  
85 (Supplementary Table 1, Supplementary Fig. 2).

86 Unlike the wide-angle architecture of dimers found in animals and fungi, the *T. brucei* ATP  
87 synthase displays an angle of 60° between the two F<sub>1</sub>/c-ring subcomplexes. The model of the  
88 *T. brucei* ATP synthase includes all 25 different subunits, 11 of which are lineage-specific (Fig.  
89 1a, Supplementary Video 1, Supplementary Fig. 3). We named the subunits according to the  
90 previously proposed nomenclature<sup>21-23</sup> (Supplementary Table 2). In addition, we identified and  
91 modeled 36 bound phospholipids, including 24 cardiolipins (Supplementary Fig. 4). Both  
92 detergents used during purification, n-dodecyl β-D-maltoside (β-DDM) and glyco-diosgenin  
93 (GDN) are also resolved in the periphery of the membrane region (Supplementary Fig. 5).

94 In the catalytic region, F<sub>1</sub> is augmented by three copies of subunit p18, each bound to subunit-  
95 α<sup>12,13</sup>. Our structure shows that p18 is involved in the unusual attachment of F<sub>1</sub> to the peripheral  
96 stalk. The membrane region includes seven conserved F<sub>0</sub> subunits (*d*, *f*, 8, *i/j*, *k*, *e*, and *g*)  
97 arranged around the central proton translocator subunit-*a*. We identified those subunits based  
98 on the structural similarity and matching topology to their yeast counterparts (Fig 2).  
99 Surprisingly, the long helix-2 of subunit-*b* (*bH2*), which constitutes the central part of the  
100 peripheral stalk in other organisms and associates with subunit-*a* in the membrane, is absent in  
101 *T. brucei*. By contrast, *bH1* from the yeast structure superposes well with the single  
102 transmembrane helix of ATPTB14, which anchors the newly identified subunit-*e* and -*g* to the  
103 F<sub>0</sub> (Fig 2a). Therefore, ATPTB14 may represent a highly reduced homolog of subunit-*b*.

104 The membrane region contains a peripheral subcomplex, formed primarily by the phylum-  
105 specific ATPTB1,6,12 and ATPEG3 (Fig. 1b). It is separated from the conserved core by a  
106 membrane-intrinsic cavity, in which nine bound cardiolipins are resolved (Fig. 1c), and the  
107 C-terminus of ATPTB12 interacts with the luminal β-barrel of the c<sub>10</sub>-ring. In the cavity of the  
108 decameric c-ring near the matrix side, 10 Arg66<sub>c</sub> residues coordinate a ligand density, which  
109 is consistent with a pyrimidine ribonucleoside triphosphate (Fig. 1d). We assign this density as  
110 uridine-triphosphate (UTP), due to its large requirement in the mitochondrial RNA metabolism  
111 of African trypanosomes being a substrate for post-transcriptional RNA editing<sup>24</sup>, and addition  
112 of poly-uridine tails to gRNAs and rRNAs<sup>25,26</sup>, as well as due to low abundance of cytidine  
113 triphosphate (CTP)<sup>27</sup>. The nucleotide base is inserted between two Arg82<sub>c</sub> residues, whereas  
114 the triphosphate region is coordinated by another five Arg82<sub>c</sub> residues, with Tyr79<sub>8</sub> and Asn76<sub>8</sub>  
115 providing asymmetric coordination contacts. The presence of a nucleotide inside the c-ring is  
116 surprising, given the recent reports of phospholipids inside the c-rings in mammals<sup>5,6</sup> and  
117 ciliates<sup>9</sup>, indicating that a range of different ligands can provide structural scaffolding.

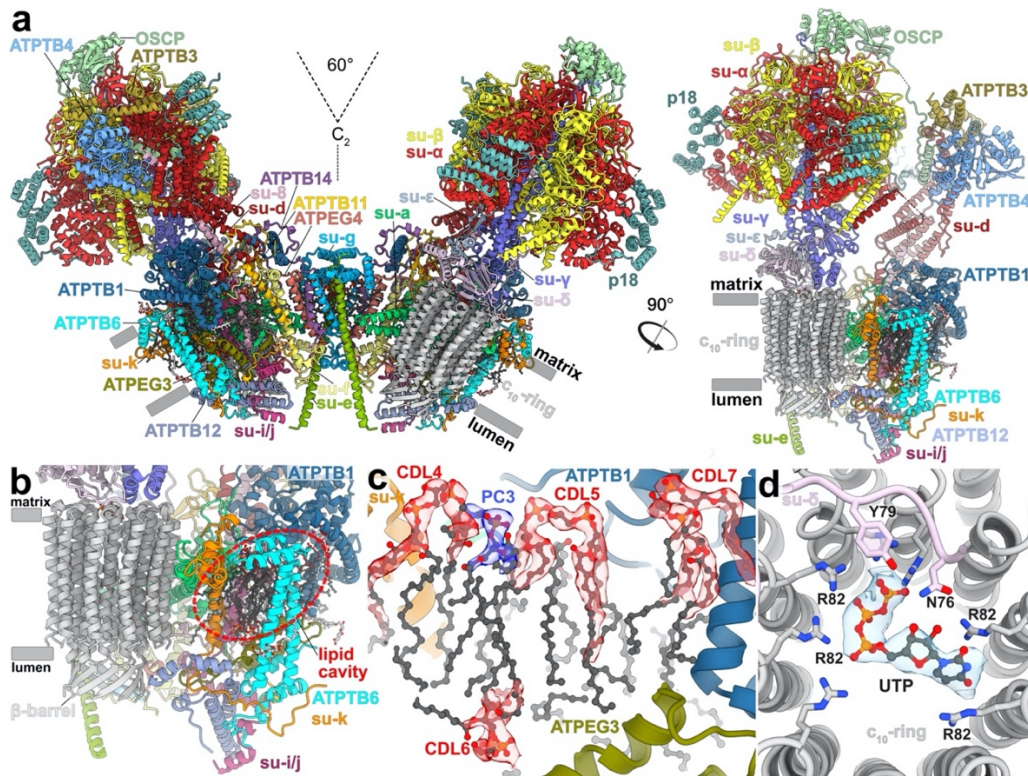

118

119 **Fig. 1: The *T. brucei* ATP synthase structure with lipids and ligands.**

120 **a**, Front and side views of the composite model with both monomers in rotational state 1. The  
 121 two  $F_1/c_{10}$ -ring complexes, each augmented by three copies of the phylum-specific p18 subunit,  
 122 are tied together at a  $60^\circ$ -angle. The membrane-bound  $F_0$  region displays a unique architecture  
 123 and is composed of both conserved and phylum-specific subunits. **b**, Side view of the  $F_0$  region  
 124 showing the luminal interaction of the ten-stranded  $\beta$ -barrel of the  $c$ -ring (grey) with ATPTB12  
 125 (pale blue). The lipid-filled peripheral  $F_0$  cavity is indicated. **c**, Close-up view of the bound  
 126 lipids within the peripheral  $F_0$  cavity with cryo-EM density shown. **d**, Top view into the  
 127 decameric  $c$ -ring with a bound pyrimidine ribonucleoside triphosphate, assigned as UTP. Map  
 128 density shown in transparent blue, interacting residues shown.

129

130 **Fig. 2: Identification of conserved  $F_0$  subunits.**

131 **a**, Top view of the membrane region with *T. brucei* subunits (colored) overlaid with  
 132 *S. cerevisiae* structure (gray transparent). Close structural superposition and matching topology  
 133 allowed the assignment of conserved subunits based on matching topology and location.  
 134 **b**, Superposition of subunits-e and -g with their *S. cerevisiae* counterparts (PDB 6B2Z)  
 135 confirms their identity.



## 136 **Peripheral stalk flexibility and distinct rotational states**

137 The trypanosomal peripheral stalk displays a markedly different architecture compared to its  
138 yeast and mammalian counterparts. In the opisthokont complexes, the peripheral stalk is  
139 organized around the long *bH2*, which extends from the membrane ~15 nm into the matrix and  
140 attaches to OSCP at the top of  $F_1$ <sup>5,7</sup>. By contrast, *T. brucei* lacks the canonical *bH2* and instead,  
141 helices 5-7 of divergent subunit-*d* and the C-terminal helix of extended subunit-8 bind to a C-  
142 terminal extension of OSCP at the apical part of the peripheral stalk (Fig. 3a). The interaction  
143 between OSCP and subunit-*d* and -8 is stabilized by soluble ATPTB3 and ATPTB4. The  
144 peripheral stalk is rooted to the membrane subcomplex by a transmembrane helix of subunit-  
145 8, wrapped on the matrix side by helices 8-11 of subunit-*d*. Apart from the canonical contacts  
146 at the top of  $F_1$ , the peripheral stalk is attached to the  $F_1$  via a euglenozoa-specific C-terminal  
147 extension of OSCP, which contains a disordered linker and a terminal helix hairpin extending  
148 between the  $F_1$ -bound p18 and subunits -*d* and -8 of the peripheral stalk (Fig. 3a,  
149 Supplementary Videos 2,3). Another interaction of  $F_1$  with the peripheral stalk occurs between  
150 the stacked C-terminal helices of subunit- $\beta$  and -*d* (Fig. 3b), the former of which structurally  
151 belongs to  $F_1$  and is connected to the peripheral stalk via a flexible linker.

152 To assess whether the unusual peripheral stalk architecture influences the rotary mechanism,  
153 we analysed 10 classes representing different rotational states. The three main states (1-3) result  
154 from a ~120° rotation of the central stalk subunit- $\gamma$ , and we identified five (1a-1e), four (2a-2d)  
155 and one (3) classes of the respective main states. The rotor positions of the rotational states 1a,  
156 2a and 3 are related by steps of 117°, 136° and 107°, respectively. Throughout all the identified  
157 substeps of the rotational state 1 (classes 1a to 1e) the rotor turns by ~33°, which corresponds  
158 approximately to the advancement by one subunit-*c* of the  $c_{10}$ -ring. While rotating along with  
159 the rotor, the  $F_1$  headpiece lags behind, advancing by only ~13°. During the following transition  
160 from 1e to 2a, the rotor advances by ~84°, whereas the  $F_1$  headpiece rotates ~22° in the opposite  
161 direction (Fig. 3c,d). This generates a counter-directional torque between the two motors,  
162 which is consistent with a power-stroke mechanism. Albeit with small differences in step size,  
163 this mechanism is consistent with a previous observation in the *Polytomella* ATP synthase<sup>8</sup>.  
164 However, due to its large, rigid peripheral stalk, the *Polytomella* ATP synthase mainly displays  
165 rotational substeps, whereas the *Trypanosoma*  $F_1$  also displays a tilting motion of ~8° revealed  
166 by rotary states 1 and 2 (Fig. 3e, Supplementary Video 2). The previously reported hinge  
167 motion between the N- and C-terminal domains of OSCP<sup>8</sup> is not found in our structures,  
168 instead, the conformational changes of the  $F_1/c_{10}$ -ring subcomplex are accommodated by a 5°  
169 bending of the apical part of the peripheral stalk. (Fig. 3e, Supplementary Videos 2,3).  
170 Together, the structural data indicate that the divergent peripheral stalk attachment confers  
171 greater conformational flexibility to the *T. brucei* ATP synthase.

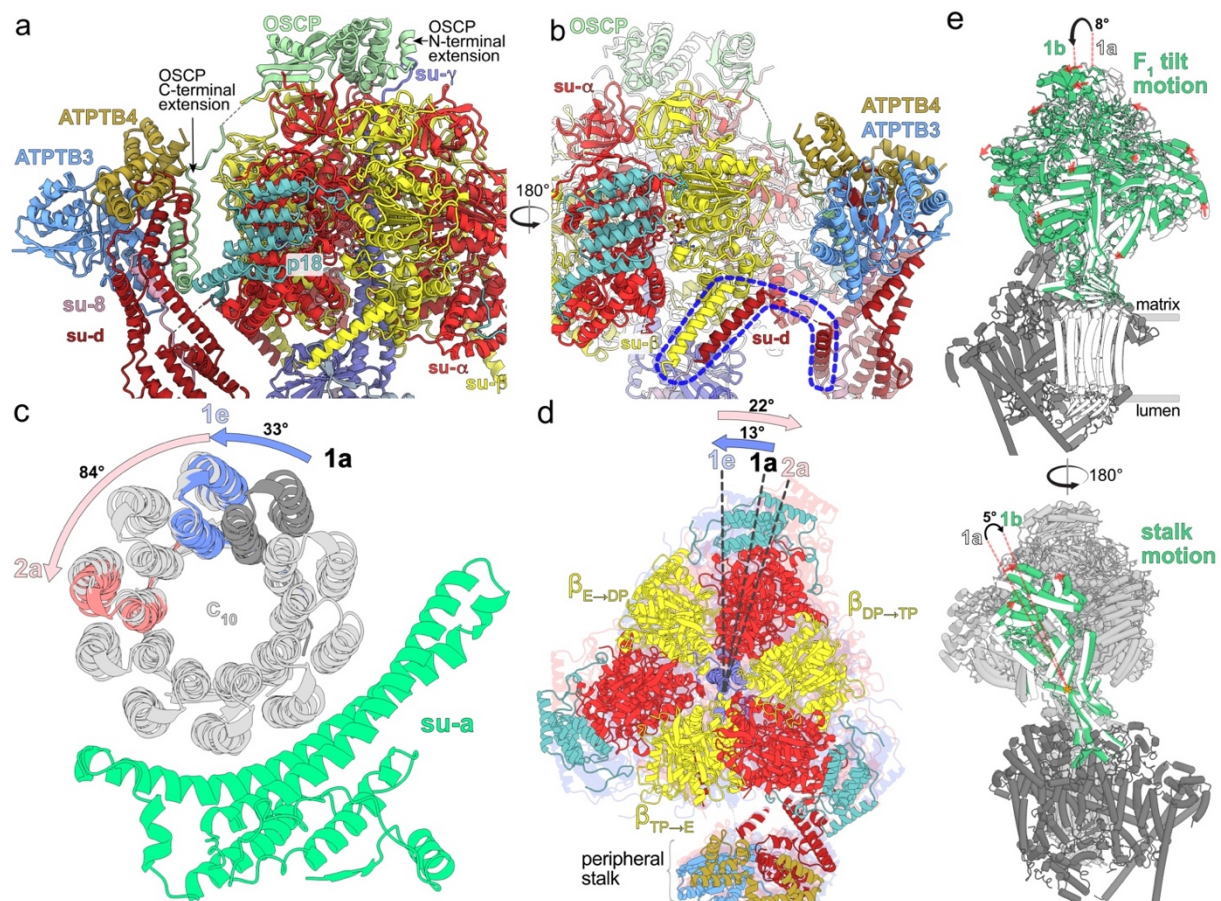

172

173 **Fig. 3: A divergent peripheral stalk allows high flexibility during rotary catalysis.** **a**, N-  
 174 terminal OSCP extension provides a permanent central stalk attachment, while the C-terminal  
 175 extension provides a phylum-specific attachment to the divergent peripheral stalk. **b**, The  
 176 C-terminal helices of subunits  $-\beta$  and  $-d$  provide a permanent  $F_1$  attachment. **c**, Substeps of the  $c$ -  
 177 ring during transition from rotational state 1 to 2. **d**,  $F_1$  motion accommodating steps shown in  
 178 (c). After advancing along with the rotor to state 1e, the  $F_1$  rotates in the opposite direction  
 179 when transitioning to state 2a. **e**, Tilting motion of  $F_1$  and accommodating bending of the  
 180 peripheral stalk.

181

### 182 **Luminal proton half-channel is insulated by a lipid and contains ordered water molecules**

183 The mechanism of proton translocation involves sequential protonation of E102 of subunits- $c$ ,  
 184 rotation of the  $c_{10}$ -ring with neutralized E102c exposed to the phospholipid bilayer, and release  
 185 of protons on the other side of the membrane. The sites of proton binding and release are  
 186 separated by the conserved R146 contributed by the horizontal helix H5 of subunit- $a$  and are  
 187 accessible from the cristae lumen and mitochondrial matrix by aqueous half-channels (Fig. 4a).  
 188 Together, R146 and the adjacent N209 coordinate a pair of water molecules in between helices  
 189 H5 and H6 (Fig. 4b). A similar coordination has been observed in the *Polytomella* ATP  
 190 synthase<sup>8</sup>. The coordination of water likely restricts the R146 to rotamers that extend towards  
 191 the  $c$ -ring, with which it is thought to interact.

192 In our structure, the luminal half-channel is filled with a network of resolved water densities,  
 193 ending in a chain of five ordered water molecules (W1-W5; Fig. 4c,d,e). The presence of

194 ordered water molecules in the aqueous channel is consistent with a Grotthuss-type mechanism  
 195 for proton transfer, which would not require long-distance diffusion of water molecules<sup>5</sup>.  
 196 However, because some distances between the observed water molecules are too large for  
 197 direct hydrogen bonding, proton transfer may involve both coordinated and disordered water  
 198 molecules. The distance of 7 Å between the last resolved water (W1) and D202<sub>a</sub>, the conserved  
 199 residue that is thought to transfer protons to the *c*-ring, is too long for direct proton transfer.  
 200 Instead, it may occur via the adjacent H155<sub>a</sub>. Therefore, our structure resolves individual  
 201 elements participating in proton transport (Fig. 4d,e).

202 The luminal proton half-channel in the mammalian<sup>5,6</sup> and apicomplexan<sup>11</sup> ATP synthase is  
 203 lined by the transmembrane part of *b*H2, which is absent in *T. brucei*. Instead, the position of  
 204 *b*H2 is occupied by a fully ordered phosphatidylcholine in our structure (PC1; Fig. 4a,c).  
 205 Therefore, a bound lipid replaces a proteinaceous element in the proton path.

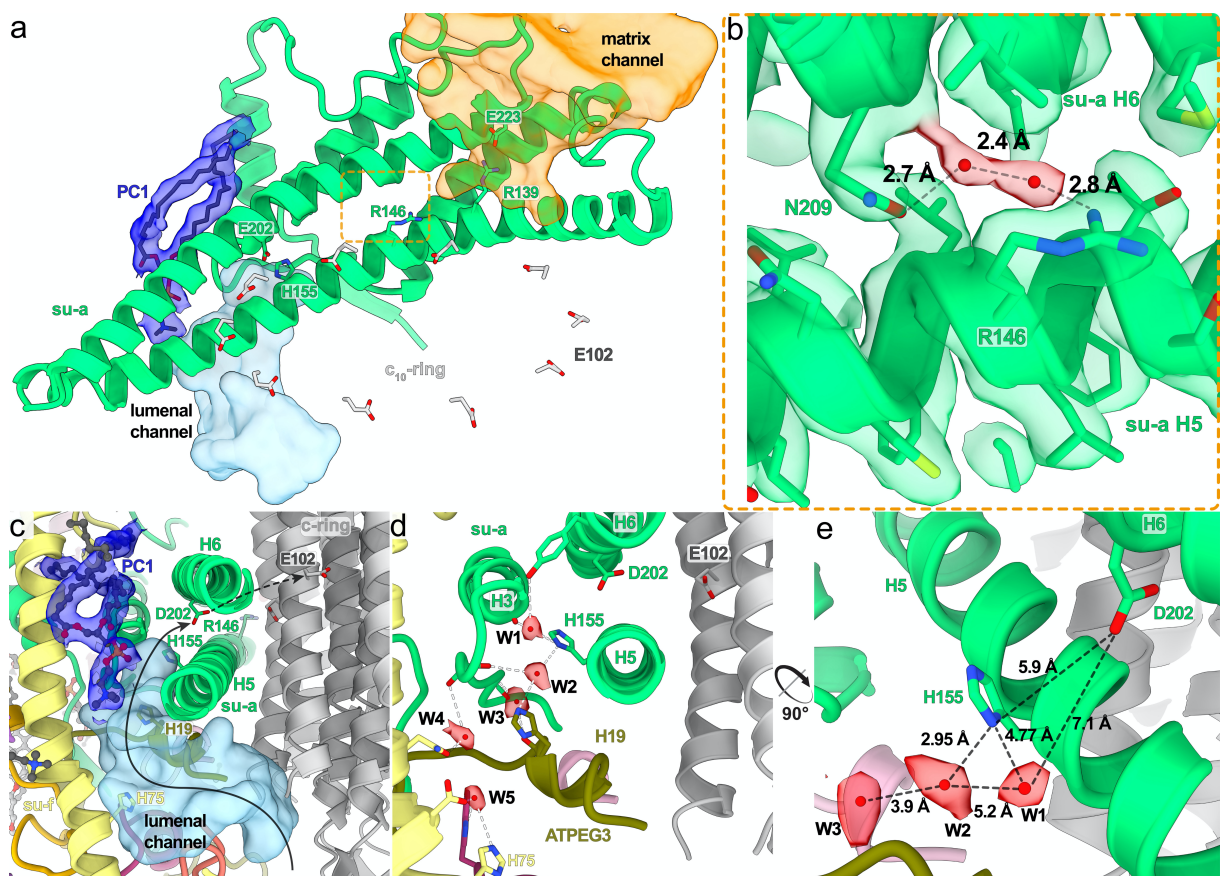

206 **Fig. 4: The luminal half-channel contains ordered water molecules and is confined by an**  
 207 **F<sub>o</sub>-bound lipid.** **a**, Subunit-*a* (green) with the matrix (orange) and luminal (light blue)  
 208 channels, and an ordered phosphatidylcholine (PC1; blue). E102 of the *c*<sub>10</sub>-ring shown in grey.  
 209 **b**, Close-up view of the highly conserved R146<sub>a</sub> and N209<sub>a</sub>, which coordinate two water  
 210 molecules between helices H5-6<sub>a</sub>. **c**, Sideview of the luminal channel with proton pathway  
 211 (light blue) and confining phosphatidylcholine (blue). **d**, Chain of ordered water molecules in  
 212 the luminal channel. Distances between the W1-W5 (red) are 5.2, 3.9, 7.3 and 4.8 Å,  
 213 respectively. **e**, The ordered waters extend to H155<sub>a</sub>, which likely mediates the transfer of  
 214 protons to D202<sub>a</sub>.  
 215

216



217

## 218 **Subunit-g facilitates assembly of different ATP synthase oligomers**

219 Despite sharing a set of conserved F<sub>o</sub> subunits, the *T. brucei* ATP synthase dimer displays a  
220 markedly different dimer architecture compared to previously determined structures. First, its  
221 dimerization interface of 3,600 Å<sup>2</sup> is smaller than that of the *E. gracilis* type-IV (10,000 Å<sup>2</sup>)  
222 and the *T. thermophila* type-III ATP synthases (16,000 Å<sup>2</sup>). Second, unlike mammalian and  
223 fungal ATP synthase, in which the peripheral stalks extend in the plane defined by the two  
224 rotary axes, in our structure the monomers are rotated such that the peripheral stalks are offset  
225 laterally on the opposite sides of the plane. Due to the rotated monomers, this architecture is  
226 associated with a specific dimerization interface, where two subunit-g copies interact  
227 homotypically on the C<sub>2</sub> symmetry axis (Fig. 5a, Supplementary Video 1). Both copies of H1-  
228 2<sub>g</sub> extend horizontally along the matrix side of the membrane, clamping against each other  
229 (Fig. 5c,e). This facilitates formation of contacts between an associated transmembrane helix  
230 of subunit-e with the neighbouring monomer via subunit-a' in the membrane, and -f' in the  
231 lumen, thereby further contributing to the interface (Fig. 5b). Thus, the ATP synthase dimer is  
232 assembled via the subunit-e/g module. The C-terminal part of the subunit-e helix extends into  
233 the lumen, towards the ten-stranded β-barrel of the c-ring (Supplementary Fig. 6a). The  
234 terminal 23 residues are disordered with poorly resolved density connecting to the detergent  
235 plug of the c-ring β-barrel (Supplementary Fig. 6b). This resembles the luminal C-terminus of  
236 subunit-e in the bovine structure<sup>5</sup>, indicating a conserved interaction with the c-ring.

237 The e/g module is held together by four bound cardiolipins in the matrix leaflet, anchoring it  
238 to the remaining F<sub>o</sub> region (Fig. 5c). The head groups of the lipids are coordinated by polar and  
239 charged residues with their acyl chains filling a central cavity in the membrane region at the  
240 dimer interface (Fig 5c, Supplementary Fig. 4f). Cardiolipin binding has previously been  
241 reported to be obligatory for dimerization in secondary transporters<sup>28</sup> and the depletion of  
242 cardiolipin synthase resulted in reduced levels of ATP synthase in the bloodstream  
243 trypanosomes<sup>14</sup>.

244 Interestingly, for yeasts, early blue native gel electrophoresis<sup>29</sup> and subtomogram averaging  
245 studies<sup>2</sup> suggested subunit-g as potentially dimer-mediating, however the e/g modules are  
246 located laterally opposed on either side of the dimer long axis, in the periphery of the complex,  
247 ~8.5 nm apart from each other. Because the e/g modules do not interact directly within the  
248 yeast ATP synthase dimer, they have been proposed to serve as membrane-bending elements,  
249 whereas the major dimer contacts are formed by subunit-a and -i/j<sup>7</sup>. In mammals, the e/g  
250 module occupies the same position as in yeasts, forming the interaction between two diagonal  
251 monomers in a tetramer<sup>5,6,30</sup>, as well as between parallel dimers<sup>31</sup>. The comparison with our  
252 structure shows that the overall organization of the intra-dimeric trypanosomal and inter-  
253 dimeric mammalian e/g module is structurally similar (Fig. 5d). Furthermore, kinetoplastid  
254 parasites and mammals share conserved GXXXG motifs in subunit-e<sup>32</sup> and -g (Supplementary  
255 Fig. 8), which allow close interaction of their transmembrane helices (Fig. 5e), providing  
256 further evidence for subunit homology. However, while the mammalian ATP synthase dimers  
257 are arranged perpendicularly to the long axis of their rows along the edge of cristae<sup>33</sup>, the  
258 *T. brucei* dimers on the rims of discoidal cristae are inclined ~45° to the row axis<sup>15</sup>. Therefore,



259 the *e/g* module occupies equivalent positions in the rows of both evolutionary distant groups  
 260 (Fig. 5f and reference 31).

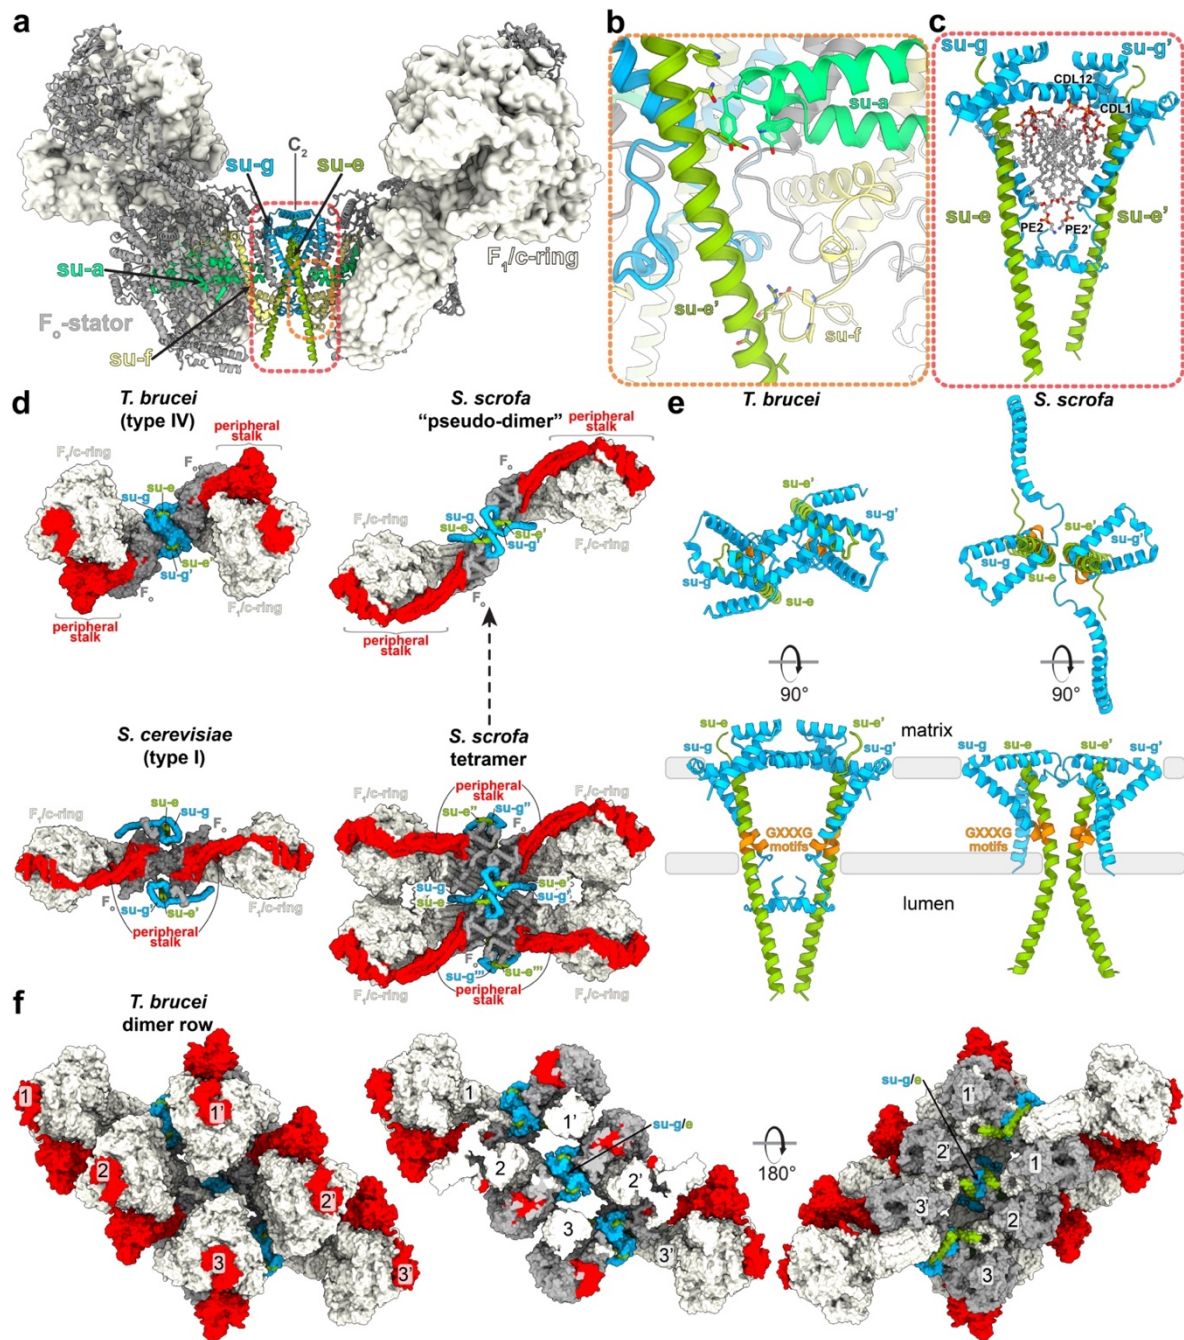

261

262 **Fig. 5: The homotypic dimerization motif of subunit-g generates a conserved**  
 263 **oligomerisation module.** **a**, Side view with dimerising subunits colored. **b,c**, The dimer  
 264 interface is constituted by (b) subunit-*e*' contacting subunit-*a* in the membrane and subunit-*f*  
 265 in the lumen, (c) subunits *e* and *g* from both monomers forming a subcomplex with bound  
 266 lipids. **d**, Subunit-*g* and -*e* form a dimerization motif in the trypanosomal (type-IV) ATP  
 267 synthase dimer (this study), the same structural element forms the oligomerisation motif in the  
 268 porcine ATP synthase tetramer. The structural similarity of the pseudo-dimer in the porcine  
 269 structure with the trypanosomal dimer suggests that type I and IV ATP synthase dimers have  
 270 evolved through divergence from a common ancestor. **e**, The dimeric subunit-*e/g* structures are

271 conserved in pig (PDB 6ZNA) and *T. brucei* (this work) and contain a conserved GXXXG  
 272 motif (orange) mediating interaction of transmembrane helices. **f**, Models of the ATP synthase  
 273 dimers fitted into subtomogram averages of short oligomers<sup>15</sup>: matrix view, left; cut-through,  
 274 middle, luminal view, right (EMD-3560).

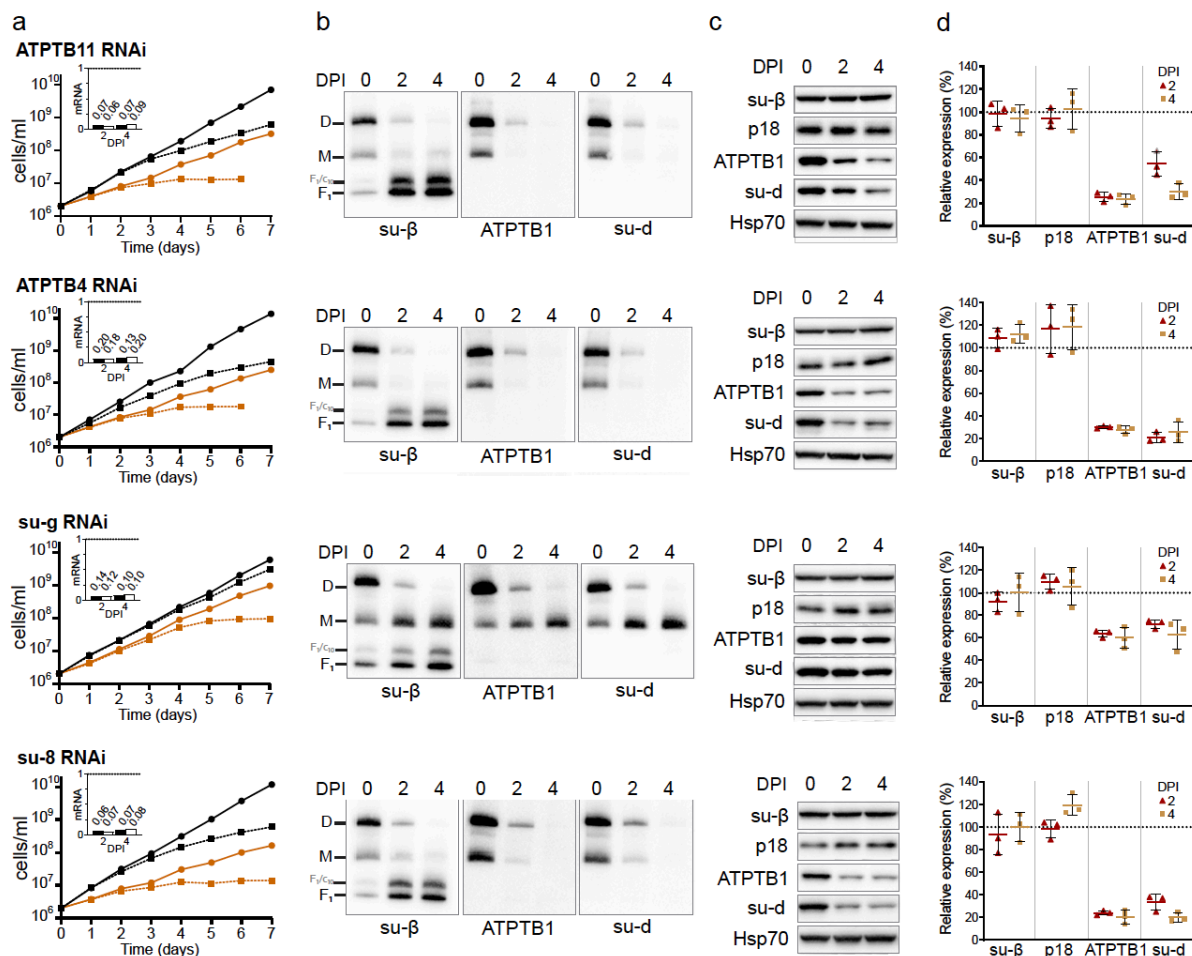

275 **Fig. 6: RNAi knockdown of subunit-g results in monomerization of ATP synthase. a,**  
 276 **Growth curves of non-induced (solid lines) and tetracycline-induced (dashed lines) RNAi cell**  
 277 **lines grown in the presence (black) or absence (brown) of glucose. The insets show relative**  
 278 **levels of the respective target mRNA at indicated days post-induction (DPI) normalized to the**  
 279 **levels of 18S rRNA (black bars) or β-tubulin (white bars). b, Immunoblots of mitochondrial**  
 280 **lysates from indicated RNAi cell lines resolved by BN-PAGE probed with antibodies against**  
 281 **indicated ATP synthase subunits. c, Representative immunoblots of whole cell lysates from**  
 282 **indicated RNAi cell lines probed with indicated antibodies. d, Quantification of three replicates**  
 283 **of immunoblots in (c). Values were normalized to the signal of loading marker Hsp70 and to**  
 284 **non-induced cells. Plots show means with standard deviations (SD).**  
 285

## 286 Subunit-g retains the dimer but is not essential for the catalytic monomer

287 To validate structural insights, we knocked down each individual F<sub>o</sub> subunit by inducible RNA  
288 interference (RNAi). All target mRNAs dropped to 5-20 % of their original levels after two  
289 and four days of induction (Fig. 6a and Supplementary Fig. 7a, insets). Western blot analysis  
290 of whole-cell lysates resolved by denaturing electrophoresis revealed decreased levels of F<sub>o</sub>  
291 subunits ATPB1 and -d suggesting that integrity of F<sub>o</sub> moiety depends on the presence of other  
292 F<sub>o</sub> subunits. Immunoblotting of mitochondrial complexes resolved by blue native  
293 polyacrylamide gel electrophoresis (BN-PAGE) with antibodies against F<sub>1</sub> and F<sub>o</sub> subunits  
294 revealed a strong decrease or nearly complete loss of dimeric and monomeric forms of ATP  
295 synthases four days after induction of RNAi of most subunits (*e, f, i/j, k, 8, ATPTB3, ATPTB4,*  
296 *ATPTB6, ATPTB11, ATPTB12, ATPTB14, ATPEG3 and ATPEG4*), documenting an  
297 increased instability of the enzyme or defects in its assembly. Simultaneous increase in F<sub>1</sub>-  
298 ATPase levels demonstrated that the catalytic moiety remains intact after the disruption of the  
299 peripheral stalk or the membrane subcomplex (Fig. 6b,c,d and Supplementary Fig. 7b,c,d).

300 In contrast to the other targeted F<sub>o</sub> subunits, the downregulation of subunit-g with RNAi  
301 resulted in a specific loss of dimeric complexes with concomitant accumulation of monomers  
302 (Fig. 6b), indicating that it is required for dimerization, but not for the assembly and stability  
303 of the monomeric F<sub>1</sub>F<sub>o</sub> ATP synthase units. Transmission electron microscopy of thin cell  
304 sections revealed that the ATP synthase monomerization in the subunit-g<sup>RNAi</sup> cell line had the  
305 same effect on mitochondrial ultrastructure as nearly complete loss of monomers and dimers  
306 upon knockdown of subunit-8. Both cell lines exhibited decreased cristae counts and aberrant  
307 cristae morphology (Fig. 7a,b), including the appearance of round shapes reminiscent of  
308 structures detected upon deletion of subunit-g or -e in *Saccharomyces cerevisiae*<sup>1</sup>. These results  
309 indicate that monomerization prevents the trypanosomal ATP synthase from assembling into  
310 short helical rows on the rims of the discoidal cristae<sup>15</sup>, as has been reported for impaired  
311 oligomerisation in counterparts from other eukaryotes<sup>2,34</sup>.

312 Despite the altered mitochondrial ultrastructure, the subunit-g<sup>RNAi</sup> cells showed only a very  
313 mild growth phenotype, in contrast to all other RNAi cell lines that exhibited steadily slowed  
314 growth from day 3 to 4 after the RNAi induction (Fig. 6a, Supplementary Fig. 7a). This is  
315 consistent with the growth defects observed after the ablation of F<sub>o</sub> subunit ATPTB1<sup>19</sup> and F<sub>1</sub>  
316 subunits- $\alpha$  and p18<sup>12</sup>. Thus, the monomerization of ATP synthase upon subunit-g ablation had  
317 only a negligible effect on the fitness of trypanosomes cultured in glucose-rich media, in which  
318 ATP production by substrate level phosphorylation partially compensates for compromised  
319 oxidative phosphorylation<sup>35</sup>.

320 Measurement of oligomycin-sensitive ATP-dependent mitochondrial membrane polarization  
321 by safranin O assay in permeabilized cells showed that the proton pumping activity of the ATP  
322 synthase in the induced subunit-g<sup>RNAi</sup> cells is sufficient to generate mitochondrial membrane  
323 potential, demonstrating that the monomerized enzyme is catalytically functional. By contrast,  
324 RNAi downregulation of subunit-8, ATPTB4 and ATPTB11, and ATPTB1 resulted in a strong  
325 decline of the mitochondrial membrane polarization capacity, consistent with the loss of both  
326 monomeric and dimeric ATP synthase forms (Fig. 7c). Accordingly, knockdown of the same  
327 subunits resulted in inability to produce ATP by oxidative phosphorylation (Fig. 7d). However,  
328 upon subunit-g ablation the ATP production was affected only partially, confirming that the



329 monomerized ATP synthase remains catalytically active. The ~50 % drop of ATP production  
 330 in the subunit- $g^{RNAi}$  cells can be attributed to the decreased oxidative phosphorylation  
 331 efficiency due to the impaired cristae morphology. Indeed, when cells were cultured in the  
 332 absence of glucose enforcing the need for oxidative phosphorylation, knockdown of subunit- $g$   
 333 results in a growth arrest, albeit one to two days later than knockdown of all other tested  
 334 subunits (Fig. 6a). The data show that dimerization is critical when oxidative phosphorylation  
 335 is the predominant source of ATP.

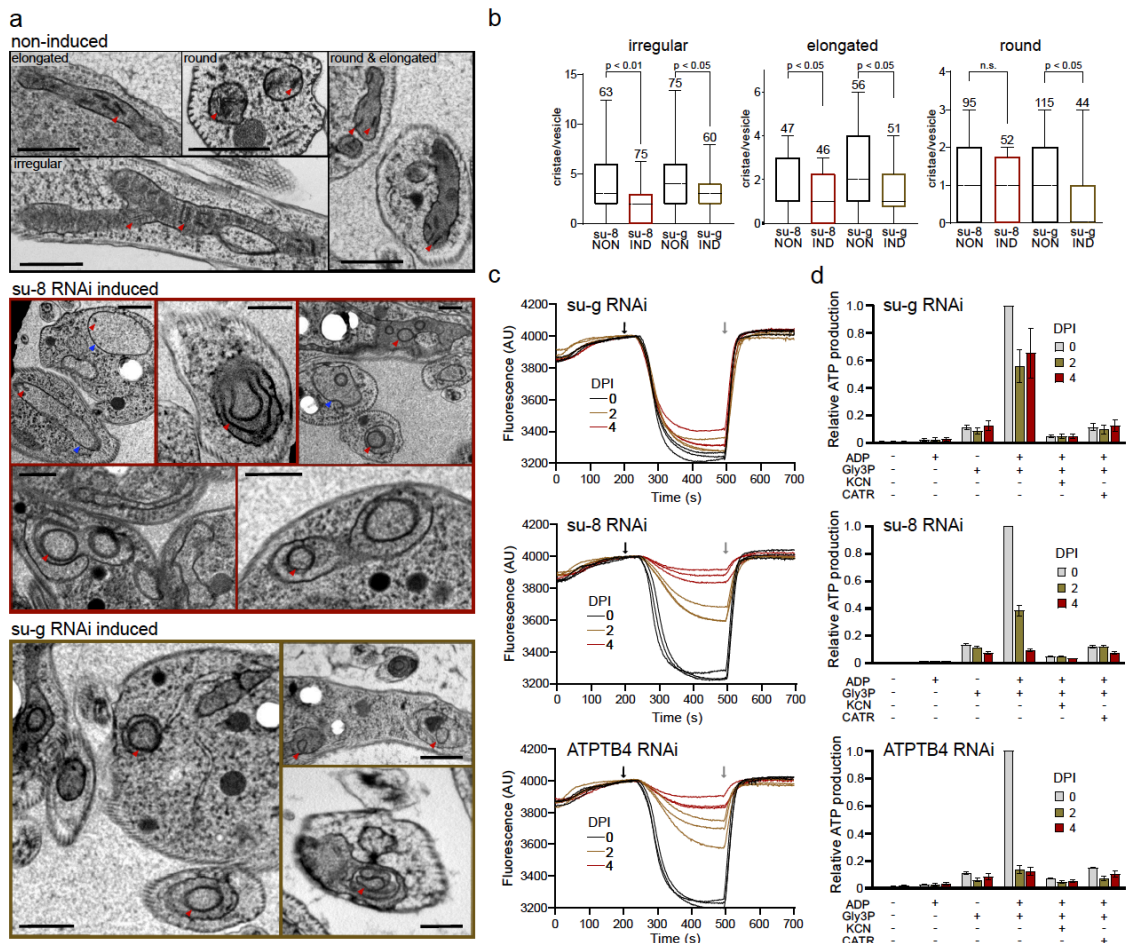

336  
 337 **Fig. 7: Monomerization of ATP synthase by subunit- $g$  knockdown results in aberrant**  
 338 **mitochondrial ultrastructure but does not abolish catalytic activity.** **a**, Transmission  
 339 electron micrographs of sections of non-induced or 4 days induced RNAi cell lines.  
 340 Mitochondrial membranes and cristae are marked with blue and red arrowheads, respectively.  
 341 Top panel shows examples of irregular, elongated and round cross-sections of mitochondria  
 342 quantified in (b). **b**, Cristae numbers per vesicle from indicated induced (IND) or non-induced  
 343 (NON) cell lines counted separately in irregular, elongated and round mitochondrial cross-  
 344 section. Boxes and whiskers show 25<sup>th</sup> to 75<sup>th</sup> and 5<sup>th</sup> to 95<sup>th</sup> percentiles, respectively. The  
 345 numbers of analysed cross-sections are indicated for each data point. **c**, Safranin O  
 346 measurement of ability to generate mitochondrial membrane potential in non-induced or  
 347 tetracycline-induced RNAi cell lines 2 and 4 DPI. Black and gray arrow indicate addition of  
 348 ATP and oligomycin, respectively. **d**, ATP production in permeabilized non-induced or  
 349 tetracycline-induced RNAi cells 2 and 4 DPI in the presence of indicated substrates and  
 350 inhibitors. Error bars represent SD of four replicates.



## 351 Discussion

352 Our structure of the mitochondrial ATP synthase dimer from the mammalian parasite *T. brucei*  
353 offers new insight into the mechanism of membrane shaping, rotary catalysis, and proton  
354 transfer. Considering that trypanosomes belong to an evolutionarily divergent group of  
355 Kinetoplastida, the ATP synthase dimer has several interesting features that differ from other  
356 dimer structures. The subunit-*b* found in bacterial and other mitochondrial F-type ATP  
357 synthases appears to be highly reduced to a single transmembrane helix *bH1* represented by a  
358 likely homolog ATPTB14. The long *bH2*, which constitutes the central part of the peripheral  
359 stalk in other organisms, and is also involved in the composition of the luminal proton half-  
360 channel, is completely absent in *T. brucei*. Interestingly, the position of *bH2* in the proton half  
361 channel is occupied by a fully ordered phosphatidylcholine molecule that replaces a well-  
362 conserved proteinaceous element in the proton path. Lack of the canonical *bH2* also affects  
363 composition of the peripheral stalk in which the divergent subunit-*d* and subunit- $\delta$  binds  
364 directly to a C-terminal extension of OSCP, indicating a remodeled peripheral stalk  
365 architecture. The peripheral stalk contacts the F<sub>1</sub> headpiece at several positions conferring  
366 greater conformational flexibility to the ATP synthase.

367 Using the structural and functional data, we also identified a conserved structural element of  
368 the ATP synthase that is responsible for its multimerization. Particularly, subunit-*g* is required  
369 for the dimerization, but dispensable for the assembly of the F<sub>1</sub>F<sub>o</sub> monomers. Although the  
370 monomerized enzyme is catalytically competent, the inability to form dimers results in  
371 defective cristae structure, and consequently leads to compromised oxidative phosphorylation  
372 and cease of proliferation. The cristae-shaping properties of mitochondrial ATP synthase are  
373 critical for sufficient ATP production by oxidative phosphorylation, but not for other  
374 mitochondrial functions, as demonstrated by the lack of growth phenotype of subunit-*g*<sup>RNAi</sup>  
375 cells in the presence of glucose. Thus, trypanosomal subunit-*g* depletion strain represents an  
376 experimental tool to assess the roles of the enzyme's primary catalytic function and  
377 mitochondria-specific membrane-shaping activity, highlighting the importance of the latter for  
378 oxidative phosphorylation.

379 Based on our data and previously published structures, we propose an ancestral state with  
380 double rows of ATP synthase monomers connected by *e/g* modules longitudinally and by other  
381 F<sub>o</sub> subunits transversally. During the course of evolution, different pairs of adjacent ATP  
382 synthase monomer units formed stable dimers in individual lineages (Fig. 8). This gave rise to  
383 the highly divergent type-I and type-IV ATP synthase dimers with subunit-*e/g* modules serving  
384 either as dimerization or oligomerization motives, respectively. Because trypanosomes belong  
385 to the deep-branching eukaryotic supergroup Discoba, the proposed arrangement might have  
386 been present in the last eukaryotic common ancestor. Although sequence similarity of subunit-  
387 *g* is low and restricted to the single transmembrane helix, we found homologs of subunit-*g* in  
388 addition to Opisthokonta and Discoba also in Archaeplastida and Amoebozoa, which represent  
389 other eukaryotic supergroups, thus supporting the ancestral role in oligomerization  
390 (Supplementary Fig. 8). Taken together, our analysis reveals that mitochondrial ATP synthases  
391 that display markedly diverged architecture share the ancestral structural module that promotes  
392 oligomerization.

393

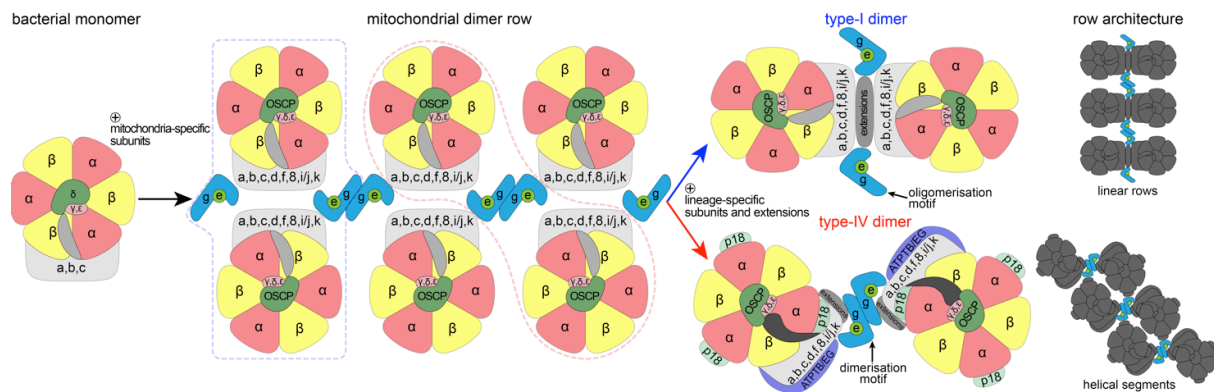

394

395 **Fig. 8: The subunit-*e/g* module is an ancestral oligomerization motif of ATP synthase.**  
396 Schematic model of the evolution of type-I and IV ATP synthases. Mitochondrial ATP  
397 synthases are derived from a monomeric complex of proteobacterial origin. In a mitochondrial  
398 ancestor, acquisition of mitochondria-specific subunits, including the subunit-*e/g* module  
399 resulted in the assembly of ATP synthase double rows, the structural basis for cristae  
400 biogenesis. Through divergence, different ATP synthase dimer architectures evolved, with the  
401 subunit-*e/g* module functioning as an oligomerization (type I) or dimerization (type IV) motif,  
402 resulting in distinct row assemblies between mitochondrial lineages.

403

## 404 **Materials and Methods**

### 405 Cell culture and isolation of mitochondria

406 *T. brucei* procyclic strains were cultured in SDM-79 medium supplemented with 10% (v/v)  
407 fetal bovine serum. For growth curves in glucose-free conditions, cells were grown in SDM-  
408 80 medium with 10 % dialysed FBS. RNAi cell lines were grown in presence of 2.5  $\mu\text{g/ml}$   
409 phleomycin and 1  $\mu\text{g/ml}$  puromycin. For ATP synthase purification, mitochondria were  
410 isolated from the Lister strain 427. Typically,  $1.5 \times 10^{11}$  cells were harvested, washed in 20 mM  
411 sodium phosphate buffer pH 7.9 with 150 mM NaCl and 20 mM glucose, resuspended in  
412 hypotonic buffer 1 mM Tris-HCl pH 8.0, 1 mM EDTA, and disrupted by 10 strokes in a 40-ml  
413 Dounce homogenizer. The lysis was stopped by immediate addition of sucrose to 0.25 M.  
414 Crude mitochondria were pelleted (15 min at 16,000 xg, 4°C), resuspended in 20 mM Tris-  
415 HCl pH 8.0, 250 mM sucrose, 5 mM MgCl<sub>2</sub>, 0.3 mM CaCl<sub>2</sub> and treated with 5  $\mu\text{g/ml}$  DNase I.  
416 After 60 min on ice, one volume of the STE buffer (20 mM Tris-HCl pH 8.0, 250 mM sucrose,  
417 2 mM EDTA) was added and mitochondria were pelleted (15 min at 16000 xg, 4°C). The pellet  
418 was resuspended in 60% (v/v) Percoll in STE and loaded on six linear 10-35% Percoll gradients  
419 in STE in polycarbonate tubes for SW28 rotor (Beckman). Gradients were centrifuged for 1 h  
420 at 24,000 rpm, 4°C. The middle phase containing mitochondrial vesicles (15-20 ml per tube)  
421 was collected, washed four times in the STE buffer, and pellets were snap-frozen in liquid  
422 nitrogen and stored at -80°C.

423

### 424 Plasmid construction and generation of RNAi cell lines

425 To downregulate ATP synthase subunits by RNAi, DNA fragments corresponding to  
426 individual target sequences were amplified by PCR from Lister 427 strain genomic DNA using

427 forward and reverse primers extended with restriction sites *XhoI* & *KpnI* and *XbaI* & *BamHI*,  
428 respectively (Supplementary Table 3). Each fragment was inserted into the multiple cloning  
429 sites 1 and 2 of pAZ0055 vector, derived from pRP<sup>HYG-iSL</sup> (courtesy of Sam Alford) by  
430 replacement of hygromycin resistance gene with phleomycin resistance gene, with restriction  
431 enzymes *KpnI/BamHI* and *XhoI/XbaI*, respectively. Resulting constructs with tetracycline  
432 inducible T7 polymerase driven RNAi cassettes were linearized with *NotI* and transfected into  
433 a cell line derived from the Lister strain 427 by integration of the SmOx construct for  
434 expression of T7 polymerase and the tetracycline repressor<sup>36</sup> into the  $\beta$ -tubulin locus. RNAi  
435 was induced in selected semi-clonal populations by addition of 1  $\mu$ g/ml tetracycline and the  
436 downregulation of target mRNAs was verified by quantitative RT-PCR 2 and 4 days post  
437 induction. The total RNA isolated by RNeasy Mini Kit (Qiagen) was treated with 2  $\mu$ g of  
438 DNase I, and then reverse transcribed to cDNA with TaqMan Reverse Transcription kit  
439 (Applied Biosciences). qPCR reactions were set with Light Cycler 480 SYBR Green I Master  
440 mix (Roche), 2  $\mu$ l of cDNA and 0.3  $\mu$ M primers (Supplementary Table 3), and run on  
441 LightCycler 480 (Roche). Relative expression of target genes was calculated using  $-\Delta\Delta C_t$   
442 method with 18S rRNA or  $\beta$ -tubulin as endogenous reference genes and normalized to  
443 noninduced cells.

444

#### 445 Denaturing and blue native polyacrylamide electrophoresis and immunoblotting

446 Whole cell lysates for denaturing sodium dodecyl sulphate polyacrylamide electrophoresis  
447 (SDS-PAGE) were prepared from cells resuspended in PBS buffer (10 mM phosphate buffer,  
448 130 mM NaCl, pH 7.3) by addition of 3x Laemmli buffer (150 mM Tris pH 6.8, 300 mM 1,4-  
449 dithiothreitol, 6% (w/v) SDS, 30% (w/v) glycerol, 0.02% (w/v) bromophenol blue) to final  
450 concentration of  $1 \times 10^7$  cells in 30  $\mu$ l. The lysates were boiled at 97°C for 10 min and stored at  
451 -20°C. For immunoblotting, lysates from  $3 \times 10^6$  cells were separated on 4-20 % gradient Tris-  
452 glycine polyacrylamide gels (BioRad 4568094), electroblotted onto a PVDF membrane (Pierce  
453 88518), and probed with respective antibodies (Supplementary Table 4). Membranes were  
454 incubated with the Clarity Western ECL substrate (BioRad 1705060EM) and  
455 chemiluminescence was detected on a ChemiDoc instrument (BioRad). Band intensities were  
456 quantified densitometrically using the ImageLab software. The levels of individual subunits  
457 were normalized to the signal of mtHsp70.

458 Blue native PAGE (BN-PAGE) was performed as described earlier<sup>12</sup> with following  
459 modifications. Crude mitochondrial vesicles from  $2 \times 10^8$  cells were resuspended in 1 M  $\epsilon$ -  
460 aminocaproic acid (ACA) and solubilized with 2% (w/v) dodecylmaltoside ( $\beta$ -DDM) for 1 h  
461 on ice. Lysates were cleared at 16,000 g for 30 min at 4°C and their protein concentration was  
462 estimated using bicinchoninic acid assay and diluted to 0.25  $\mu$ g/  $\mu$ l. 16  $\mu$ l of each sample was  
463 mixed with 2  $\mu$ l of 50 % (w/v) glycerol and 1.5  $\mu$ l of loading dye (500 mM ACA, 5% (w/v)  
464 Coomassie Brilliant Blue G-250) and resolved on Native PAGE 3-12% Bis-Tris gels  
465 (Invitrogen). After the electrophoresis (3 h, 140 V, 4°C), proteins were transferred by  
466 electroblotting onto a PVDF membrane (2 h, 100 V, 4°C, stirring), followed by  
467 immunodetection with an appropriate antibody (Supplementary Table 4).

468

469

#### 470 Mitochondrial membrane potential measurement

471 Mitochondrial membrane potential was determined fluorometrically employing safranin O dye  
472 (Sigma S2255) in permeabilized cells. For each sample,  $2 \times 10^7$  cells were harvested and washed  
473 with ANT buffer (8 mM KCl, 110 mM K-gluconate, 10 mM NaCl, 10 mM free-acid Hepes,  
474 10 mM  $K_2HPO_4$ , 0.015 mM EGTA potassium salt, 10 mM mannitol, 0.5 mg/ml fatty acid-free  
475 BSA, 1.5 mM  $MgCl_2$ , pH 7.25). The cells were permeabilized by 4  $\mu$ M digitonin in 2 ml of  
476 ANT buffer containing 5  $\mu$ M safranin O. Fluorescence was recorded for 700 s in a Hitachi F-  
477 7100 spectrofluorimeter (Hitachi High Technologies) at a 5-Hz acquisition rate, using 495 nm  
478 and 585 nm excitation and emission wavelengths, respectively. 1 mM ATP (PanReac  
479 AppliChem A1348,0025) and 10  $\mu$ g/ml oligomycin (Sigma O4876) were added after 200 s and  
480 500 s, respectively. Final addition of the uncoupler SF 6847 (250 nM; Enzo Life Sciences  
481 BML-EI215-0050) served as a control for maximal depolarization. All experiments were  
482 performed at room temperature and constant stirring.

483

#### 484 ATP production assay

485 ATP production in digitonin-isolated mitochondria was performed as described previously<sup>37</sup>.  
486 Briefly,  $1 \times 10^8$  cells per time point were lysed in SoTE buffer (600 mM sorbitol, 2 mM EDTA,  
487 20 mM Tris-HCl, pH 7.75) containing 0.015% (w/v) digitonin for 5 min on ice. After  
488 centrifugation (3 min, 4,000 g, 4°C), the soluble cytosolic fraction was discarded and the  
489 organellar pellet was resuspended in 75  $\mu$ l of ATP production assay buffer (600 mM sorbitol,  
490 10 mM  $MgSO_4$ , 15 mM potassium phosphate buffer pH 7.4, 20 mM Tris-HCl pH 7.4, 2.5  
491 mg/ml fatty acid-free BSA). ATP production was induced by addition of 20 mM DL-glycerol  
492 phosphate (sodium salt) and 67  $\mu$ M ADP. Control samples were preincubated with the  
493 inhibitors potassium cyanide (1 mM) and carboxyatractyloside (6.5  $\mu$ M) for 10 min at room  
494 temperature. After 30 min at room temperature, the reaction was stopped by addition of 1.5  $\mu$ l  
495 of 70% perchloric acid. The concentration of ATP was estimated using the Roche ATP  
496 Bioluminescence Assay Kit HS II in a Tecan Spark plate reader. The luminescence values of  
497 the RNAi induced samples were normalized to that of the corresponding noninduced sample.

498

#### 499 Thin sectioning and transmission electron microscopy

500 The samples were centrifuged and pellet was transferred to the specimen carriers which were  
501 completed with 20% BSA and immediately frozen using high pressure freezer Leica EM ICE  
502 (Leica Microsystems). Freeze substitution was performed in the presence of 2% osmium  
503 tetroxide diluted in 100% acetone at -90°C. After 96 h, specimens were warmed to -20°C at a  
504 slope 5 °C/h. After the next 24 h, the temperature was increased to 3°C (3°C/h). At room  
505 temperature, samples were washed in acetone and infiltrated with 25%, 50%, 75%  
506 acetone/resin EMBED 812 (EMS) mixture 1 h at each step. Finally, samples were infiltrated in  
507 100% resin and polymerized at 60°C for 48h. Ultrathin sections (70 nm) were cut using a  
508 diamond knife, placed on copper grids and stained with uranyl acetate and lead citrate. TEM  
509 micrographs were taken with Mega View III camera (SIS) using a JEOL 1010 TEM operating  
510 at an accelerating voltage of 80 kV.



511

### 512 Purification of *T. brucei* ATP synthase dimers

513 Mitochondria from  $3 \times 10^{11}$  cells were lysed by 1 % (w/v)  $\beta$ -DDM in 60 ml of 20 mM Bis-tris  
514 propane pH 8.0 with 10 % glycerol and EDTA-free Complete protease inhibitors (Roche) for  
515 20 min at 4°C. The lysate was cleared by centrifugation at 30,000 xg for 20 min at 4°C and  
516 adjusted to pH 6.8 by drop-wise addition of 1 M 3-(N-morpholino) propanesulfonic acid pH  
517 5.9. Recombinant TbIF<sub>1</sub> without dimerization region, whose affinity to F<sub>1</sub>-ATPase was  
518 increased by N-terminal truncation and substitution of tyrosine 36 with tryptophan<sup>20</sup>, with a C-  
519 terminal glutathione S-transferase (GST) tag (TbIF<sub>1</sub>(9-64)-Y36W-GST) was added in  
520 approximately 10-fold molar excess over the estimated content of ATP synthase. Binding of  
521 TbIF<sub>1</sub> was facilitated by addition of neutralized 2 mM ATP with 4 mM magnesium sulphate.  
522 After 5 min, sodium chloride was added to 100 mM, the lysate was filtered through a 0.2  $\mu$ m  
523 syringe filter and immediately loaded on 5 ml GSTrap HP column (Cytiva) equilibrated in 20  
524 mM Bis-Tris-Propane pH 6.8 binding buffer containing 0.1 % (w/v) glyco-diosgenin (GDN;  
525 Avanti Polar Lipids), 10 % (v/v) glycerol, 100 mM sodium chloride, 1 mM tris(2-  
526 carboxyethyl)phosphine (TCEP), 1 mM ATP, 2 mM magnesium sulphate, 15  $\mu$ g/ml  
527 cardiolipin, 50  $\mu$ g/ml 1-palmitoyl-2-oleoyl-sn-glycero-3-phosphocholine (POPC), 25  $\mu$ g/ml 1-  
528 palmitoyl-2-oleoyl-sn-glycero-3-phosphoethanolamine (POPE) and 10  $\mu$ g/ml 1-palmitoyl-2-  
529 oleoyl-sn-glycero-3-[phospho-rac-(1-glycerol)] (POPG). All phospholipids were purchased  
530 from Avanti Polar Lipids (catalog numbers 840012C, 850457C, 850757C and 840757,  
531 respectively). ATP synthase was eluted with a gradient of 20 mM reduced glutathione in Tris  
532 pH 8.0 buffer containing the same components as the binding buffer. Fractions containing ATP  
533 synthase were pooled and concentrated to 150  $\mu$ l on Vivaspin centrifugal concentrator with 30  
534 kDa molecular weight cut-off. The sample was fractionated by size exclusion chromatography  
535 on a Superose 6 Increase 3.2/300 GL column (Cytiva) equilibrated in a buffer containing 20  
536 mM Tris pH 8.0, 100 mM sodium chloride, 2 mM magnesium chloride, 0.1 % (w/v) GDN,  
537 3.75  $\mu$ g/ml cardiolipin, 12.5  $\mu$ g/ml POPC, 6.25  $\mu$ g/ml POPE and 2.5  $\mu$ g/ml POPG at 0.03  
538 ml/min. Fractions corresponding to ATP synthase were pooled, supplemented with 0.05%  
539 (w/v)  $\beta$ -DDM that we and others experimentally found to better preserve dimer assemblies in  
540 cryo-EM<sup>38</sup>, and concentrated to 50  $\mu$ l.

541

### 542 Preparation of cryo-EM grids and data collection

543 Samples were vitrified on glow-discharged Quantifoil R1.2/1.3 Au 300-mesh grids after  
544 blotting for 3 sec, followed by plunging into liquid ethane using a Vitrobot Mark IV. 5,199  
545 movies were collected using EPU 1.9 on a Titan Krios (ThermoFisher Scientific) operated at  
546 300 kV at a nominal magnification of 165 kx (0.83 Å/pixel) with a Quantum K2 camera  
547 (Gatan) using a slit width of 20 eV. Data was collected with an exposure rate of 3.6  
548 electrons/px/s, a total exposure of 33 electrons/Å<sup>2</sup> and 20 frames per movie.

549

### 550 Image processing

551 Image processing was performed within the Scipion 2 framework<sup>39</sup>, using RELION-3.0 unless  
552 specified otherwise. Movies were motion-corrected using the RELION implementation of the

553 MotionCor2. 294,054 particles were initially picked using reference-based picking in  
554 Gautomatch (<http://www.mrc-lmb.cam.ac.uk/kzhang/Gautomatch>) and Contrast-transfer  
555 function parameters were using GCTF<sup>40</sup>. Subsequent image processing was performed in  
556 RELION-3.0 and 2D and 3D classification was used to select 100,605 particles, which were  
557 then extracted in an unbinned 560-pixel box (Fig. S1). An initial model of the ATP synthase  
558 dimer was obtained using *de novo* 3D model generation. Using masked refinement with applied  
559 C<sub>2</sub> symmetry, a 2.7-Å structure of the membrane region was obtained following per-particle  
560 CTF refinement and Bayesian polishing. Following C<sub>2</sub>-symmetry expansion and signal  
561 subtraction of one monomer, a 3.7 Å of the peripheral stalk was obtained. Using 3D  
562 classification (T=100) of aligned particles, with a mask on the F<sub>1</sub>/c-ring region, 10 different  
563 rotational substates were then separated and maps at 3.5-4.3 Å resolution were obtained using  
564 3D refinement. The authors note that the number of classes identified in this study likely  
565 reflects the limited number of particles, rather than the complete conformational space of the  
566 complex. By combining particles from all states belonging to main rotational state 1, a 3.7-Å  
567 map of the rotor and a 3.2-Å consensus map of the complete ATP synthase dimer with both  
568 rotors in main rotational state 1.

569

#### 570 Model building, refinement and data visualisation

571 An initial atomic model of the static F<sub>o</sub> membrane region was built automatically using  
572 Buccaneer<sup>41</sup>. Subunits were subsequently assigned directly from the cryo-EM map, 15 of them  
573 corresponding to previously identified *T. brucei* ATP synthase subunits<sup>21</sup>, while three subunits  
574 (ATPTB14, ATPEG3, ATPEG4) were newly identified using BLAST searches. Manual model  
575 building was performed in *Coot* using the *T. brucei* F<sub>1</sub> (PDB 6F5D)<sup>13</sup> and homology models<sup>42</sup>  
576 of the *E. gracilis* OSCP and c-ring (PDB 6TDU)<sup>10</sup> as starting models. Ligands were manually  
577 fitted to the map and restraints were generated by the GRADE server  
578 (<http://grade.globalphasing.org>). Real-space refinement was performed in PHENIX using auto-  
579 sharpened, local-resolution-filtered maps of the membrane region, peripheral stalk tip,  
580 c-ring/central stalk and F<sub>1</sub>F<sub>o</sub> monomers in different rotational states, respectively, using  
581 secondary structure restraints. Model statistics were generated using MolProbity<sup>43</sup> and  
582 EMRinger<sup>44</sup>. Finally, the respective refined models were combined into a composite ATP  
583 synthase dimer model and real-space refined against the local-resolution-filtered consensus  
584 ATP synthase dimer map with both monomers in rotational state 1, applying reference  
585 restraints. Figures of the structures were prepared using ChimeraX<sup>45</sup>, the proton half-channels  
586 were traced using HOLLOW<sup>46</sup>.

587

#### 588 **Data availability**

589 The atomic coordinates have been deposited in the Protein Data Bank (PDB) and are available  
590 under the accession codes: XXX (membrane-region), XXX (peripheral stalk), XXX (rotor),  
591 XXX (F<sub>1</sub>F<sub>o</sub> dimer), XXX (rotational state 1a), XXX (rotational state 1b), XXX (rotational  
592 state 1c), XXX (rotational state 1d), XXX (rotational state 1e), XXX (rotational state 2a), XXX  
593 (rotational state 2b), XXX (rotational state 2c), XXX (rotational state 2d), XXX (rotational  
594 state 3). The local resolution filtered cryo-EM maps, half maps, masks and FSC-curves have  
595 been deposited in the Electron Microscopy Data Bank with the accession codes: EMD-XXX

596 (membrane-region), EMD-XXX (peripheral stalk), EMD-XXX (rotor), EMD-XXX (F<sub>1</sub>F<sub>o</sub>  
597 dimer), EMD-XXX (rotational state 1a), EMD-XXX (rotational state 1b), EMD-XXX  
598 (rotational state 1c), EMD-XXX (rotational state 1d), EMD-XXX (rotational state 1e), EMD-  
599 XXX (rotational state 2a), EMD-XXX (rotational state 2b), EMD-XXX (rotational state 2c),  
600 EMD-XXX (rotational state 2d), EMD-XXX (rotational state 3).

601

## 602 References

- 603 1. Paumard, P. et al. The ATP synthase is involved in generating mitochondrial cristae  
604 morphology. *EMBO J* **21**, 221-30 (2002).
- 605 2. Davies, K.M., Anselmi, C., Wittig, I., Faraldo-Gomez, J.D. & Kuhlbrandt, W. Structure  
606 of the yeast F<sub>1</sub>F<sub>o</sub>-ATP synthase dimer and its role in shaping the mitochondrial cristae.  
607 *Proc Natl Acad Sci U S A* **109**, 13602-7 (2012).
- 608 3. Panek, T., Elias, M., Vancova, M., Lukes, J. & Hashimi, H. Returning to the Fold for  
609 Lessons in Mitochondrial Crista Diversity and Evolution. *Curr Biol* **30**, R575-R588  
610 (2020).
- 611 4. Kuhlbrandt, W. Structure and Mechanisms of F-Type ATP Synthases. *Annu Rev*  
612 *Biochem* **88**, 515-549 (2019).
- 613 5. Spikes, T.E., Montgomery, M.G. & Walker, J.E. Structure of the dimeric ATP synthase  
614 from bovine mitochondria. *Proc Natl Acad Sci U S A* **117**, 23519-23526 (2020).
- 615 6. Pinke, G., Zhou, L. & Sazanov, L.A. Cryo-EM structure of the entire mammalian F-  
616 type ATP synthase. *Nat Struct Mol Biol* **27**, 1077-1085 (2020).
- 617 7. Guo, H., Bueler, S.A. & Rubinstein, J.L. Atomic model for the dimeric F<sub>o</sub> region of  
618 mitochondrial ATP synthase. *Science* **358**, 936-940 (2017).
- 619 8. Murphy, B.J. et al. Rotary substates of mitochondrial ATP synthase reveal the basis of  
620 flexible F<sub>1</sub>-F<sub>o</sub> coupling. *Science* **364**, eaaw9128 (2019).
- 621 9. Flygaard, R.K., Mühleip, A., Tobiasson, V. & Amunts, A. Type III ATP synthase is a  
622 symmetry-deviated dimer that induces membrane curvature through tetramerization.  
623 *Nature Communications* **11**, 5342 (2020).
- 624 10. Mühleip, A., McComas, S.E. & Amunts, A. Structure of a mitochondrial ATP synthase  
625 with bound native cardiolipin. *Elife* **8**, e51179 (2019).
- 626 11. Mühleip, A. et al. ATP synthase hexamer assemblies shape cristae of *Toxoplasma*  
627 mitochondria. *Nature Communications* **12**, 120 (2021).
- 628 12. Gahura, O. et al. The F<sub>1</sub>-ATPase from *Trypanosoma brucei* is elaborated by three  
629 copies of an additional p18-subunit. *FEBS J* **285**, 614-628 (2018).
- 630 13. Montgomery, M.G., Gahura, O., Leslie, A.G.W., Zikova, A. & Walker, J.E. ATP  
631 synthase from *Trypanosoma brucei* has an elaborated canonical F<sub>1</sub>-domain and  
632 conventional catalytic sites. *Proc Natl Acad Sci U S A* **115**, 2102-2107 (2018).
- 633 14. Serricchio, M. et al. Depletion of cardiolipin induces major changes in energy  
634 metabolism in *Trypanosoma brucei* bloodstream forms. *FASEB J* **35**, 21176 (2020).
- 635 15. Mühleip, A.W., Dewar, C.E., Schnauffer, A., Kuhlbrandt, W. & Davies, K.M. In situ  
636 structure of trypanosomal ATP synthase dimer reveals a unique arrangement of  
637 catalytic subunits. *Proc Natl Acad Sci U S A* **114**, 992-997 (2017).

- 638 16. Schnauffer, A., Clark-Walker, G.D., Steinberg, A.G. & Stuart, K. The F<sub>1</sub>-ATP synthase  
639 complex in bloodstream stage trypanosomes has an unusual and essential function.  
640 *EMBO J* **24**, 4029-40 (2005).
- 641 17. Brown, S.V., Hosking, P., Li, J. & Williams, N. ATP synthase is responsible for  
642 maintaining mitochondrial membrane potential in bloodstream form *Trypanosoma*  
643 *brucei*. *Eukaryot Cell* **5**, 45-53 (2006).
- 644 18. Gahura, O., Hierro-Yap, C. & Zikova, A. Redesigned and reversed: Architectural and  
645 functional oddities of the trypanosomal ATP synthase. *Parasitology* **148**, 1151-1160  
646 (2021).
- 647 19. Hierro-Yap, C. et al. Bioenergetic consequences of F<sub>o</sub>F<sub>1</sub>-ATP synthase/ATPase  
648 deficiency in two life cycle stages of *Trypanosoma brucei*. *J Biol Chem* **296**, 100357  
649 (2021).
- 650 20. Gahura, O., Panicucci, B., Vachova, H., Walker, J.E. & Zikova, A. Inhibition of F<sub>1</sub>-  
651 ATPase from *Trypanosoma brucei* by its regulatory protein inhibitor TbIF1. *FEBS J*  
652 **285**, 4413-4423 (2018).
- 653 21. Zikova, A., Schnauffer, A., Dalley, R.A., Panigrahi, A.K. & Stuart, K.D. The F(0)F(1)-  
654 ATP synthase complex contains novel subunits and is essential for procyclic  
655 *Trypanosoma brucei*. *PLoS Pathog* **5**, e1000436 (2009).
- 656 22. Perez, E. et al. The mitochondrial respiratory chain of the secondary green alga *Euglena*  
657 *gracilis* shares many additional subunits with parasitic Trypanosomatidae.  
658 *Mitochondrion* **19 Pt B**, 338-49 (2014).
- 659 23. Sathish Yadav, K.N. et al. Atypical composition and structure of the mitochondrial  
660 dimeric ATP synthase from *Euglena gracilis*. *Biochim Biophys Acta* **1858**, 267-275  
661 (2017).
- 662 24. Aphasizheva, I. et al. Lexis and Grammar of Mitochondrial RNA Processing in  
663 Trypanosomes. *Trends Parasitol* **36**, 337-355 (2020).
- 664 25. Blum, B., Bakalara, N. & Simpson, L. A model for RNA editing in kinetoplastid  
665 mitochondria: "guide" RNA molecules transcribed from maxicircle DNA provide the  
666 edited information. *Cell* **60**, 189-98 (1990).
- 667 26. Adler, B.K., Harris, M.E., Bertrand, K.I. & Hajduk, S.L. Modification of *Trypanosoma*  
668 *brucei* mitochondrial rRNA by posttranscriptional 3' polyuridine tail formation. *Mol*  
669 *Cell Biol* **11**, 5878-84 (1991).
- 670 27. Hofer, A., Steverding, D., Chabes, A., Brun, R. & Thelander, L. *Trypanosoma brucei*  
671 CTP synthetase: a target for the treatment of African sleeping sickness. *Proc Natl Acad*  
672 *Sci U S A* **98**, 6412-6 (2001).
- 673 28. Gupta, K. et al. The role of interfacial lipids in stabilizing membrane protein oligomers.  
674 *Nature* **541**, 421-424 (2017).
- 675 29. Arnold, I., Pfeiffer, K., Neupert, W., Stuart, R.A. & Schagger, H. Yeast mitochondrial  
676 F<sub>1</sub>F<sub>o</sub>-ATP synthase exists as a dimer: identification of three dimer-specific subunits.  
677 *EMBO J* **17**, 7170-8 (1998).
- 678 30. Gu, J. et al. Cryo-EM structure of the mammalian ATP synthase tetramer bound with  
679 inhibitory protein IF1. *Science* **364**, 1068-1075 (2019).



- 680 31. Spikes, T.E., Montgomery, M.G. & Walker, J.E. Interface mobility between monomers  
681 in dimeric bovine ATP synthase participates in the ultrastructure of inner mitochondrial  
682 membranes. *Proc Natl Acad Sci U S A* **118**, e2021012118 (2021).
- 683 32. Cadena, L.R. et al. Mitochondrial contact site and cristae organization system and F<sub>1</sub>F<sub>0</sub>-  
684 ATP synthase crosstalk is a fundamental property of mitochondrial cristae. *mSphere* **6**,  
685 e0032721 (2021).
- 686 33. Davies, K.M. et al. Macromolecular organization of ATP synthase and complex I in  
687 whole mitochondria. *Proc Natl Acad Sci U S A* **108**, 14121-6 (2011).
- 688 34. Blum, T.B., Hahn, A., Meier, T., Davies, K.M. & Kühlbrandt, W. Dimers of  
689 mitochondrial ATP synthase induce membrane curvature and self-assemble into rows.  
690 *Proc Natl Acad Sci U S A* **116**, 4250-4255 (2019).
- 691 35. Bochud-Allemann, N. & Schneider, A. Mitochondrial substrate level phosphorylation  
692 is essential for growth of procyclic *Trypanosoma brucei*. *J Biol Chem* **277**, 32849-54  
693 (2002).
- 694 36. Poon, S.K., Peacock, L., Gibson, W., Gull, K. & Kelly, S. A modular and optimized  
695 single marker system for generating *Trypanosoma brucei* cell lines expressing T7 RNA  
696 polymerase and the tetracycline repressor. *Open Biol* **2**, 110037 (2012).
- 697 37. Allemann, N. & Schneider, A. ATP production in isolated mitochondria of procyclic  
698 *Trypanosoma brucei*. *Mol Biochem Parasitol* **111**, 87-94 (2000).
- 699 38. Aibara, S., Dienemann, C., & Cramer, P.. Structure of an inactive RNA polymerase II  
700 dimer. *Nucleic Acids Research*, gkab783 (2021).
- 701 39. de la Rosa-Trevin, J.M. et al. Scipion: A software framework toward integration,  
702 reproducibility and validation in 3D electron microscopy. *J Struct Biol* **195**, 93-9  
703 (2016).
- 704 40. Zhang, K. Gctf: Real-time CTF determination and correction. *J Struct Biol* **193**, 1-12  
705 (2016).
- 706 41. Cowtan, K. The Buccaneer software for automated model building. 1. Tracing protein  
707 chains. *Acta Crystallogr D Biol Crystallogr* **62**, 1002-11 (2006).
- 708 42. Waterhouse, A. et al. SWISS-MODEL: homology modelling of protein structures and  
709 complexes. *Nucleic Acids Res* **46**, W296-W303 (2018).
- 710 43. Williams, C.J., Headd, J.J., Moriarty, N.W., Prisant, M.G., Videau, L.L., Deis, L.N.,  
711 Verma, V., Keedy, D.A., Hintze, B.J., Chen, V.B. and Jain, S. MolProbity: More and  
712 better reference data for improved all-atom structure validation. *Protein Science*, **27**,  
713 293-315 (2018).
- 714 44. Barad, B.A., Echols, N., Wang, R.Y.R., Cheng, Y., DiMaio, F., Adams, P.D. and Fraser,  
715 J.S. EMRinger: side chain-directed model and map validation for 3D cryo-electron  
716 microscopy. *Nature methods*, **12**, 943-946 (2015).
- 717 45. Goddard, T.D. et al. UCSF ChimeraX: Meeting modern challenges in visualization and  
718 analysis. *Protein Sci* **27**, 14-25 (2018).
- 719 46. Ho, B.K. & Gruswitz, F. HOLLOW: generating accurate representations of channel  
720 and interior surfaces in molecular structures. *BMC Struct Biol* **8**, 49 (2008).

721  
722

723 **Acknowledgements**

724 We are grateful to Sir John E. Walker and Martin Montgomery for invaluable assistance with  
725 ATP synthase purification in the initial stage of the project. We acknowledge Cryo-electron  
726 microscopy and tomography core facility of CIISB, Instruct-CZ Centre, supported by MEYS  
727 CR (LM2018127). This work was supported by the Czech Science Foundation grants number  
728 18-17529S to A.Z. and 20-04150Y to O.G. and by European Regional Development Fund  
729 (ERDF) and Ministry of Education, Youth and Sport (MEYS) project  
730 CZ.02.1.01/0.0/0.0/16\_019/0000759 to A.Z., Swedish Foundation for Strategic Research  
731 (FFL15:0325), Ragnar Söderberg Foundation (M44/16), European Research Council (ERC-  
732 2018-StG-805230), Knut and Alice Wallenberg Foundation (2018.0080), and EMBO Young  
733 Investigator Programme to A.A.

734

735 **Author contributions**

736 O.G. prepared the sample for cryo-EM. O.G. and A.M. performed initial screening. A.M.  
737 processed the cryo-EM data and built the model. B.P., C.H.Y., M.J., M.S., O.G. and A.Z.  
738 performed biochemical analysis. O.G., A.M. and A.A. analyzed the structure. O.G., A.M., A.A.  
739 and A.Z. wrote the manuscript. All authors contributed to the analysis and the final version of  
740 the manuscript.

741 **SUPPLEMENTARY INFORMATION**

742

743 **Supplementary Videos:**

744

745 **Supplementary Video 1. Overall structure and subunit-*e/g* module of trypanosomal ATP**  
746 **synthase dimers.** Subunits are coloured as in Figure 1. Phospholipids and ligands are shown  
747 as sticks.

748

749 **Supplementary Video 2. Rotary cycle of *T. brucei* ATP synthase.** Top view showing  
750 flexibility of the peripheral stalk, including bending of its apical part, and rotational and tilting  
751 motions of F<sub>1</sub>.

752

753 **Supplementary Video 3. Rotary cycle of *T. brucei* ATP synthase.** Side view showing  
754 rotational and tilting motions of the F<sub>1</sub>/*c*-ring subcomplex.

755

756

757

758

759

760

761

762

763

764

765

766

767

768

769

770

771

772

773

774



775 **Supplementary Tables:**

776

777 **Supplementary Table 1. List of models and refinement statistics**

|                                            | Mem-brane region                                    | Rotor          | Periphe-ral stalk | F <sub>1</sub> F <sub>0</sub> dimer | Rot. 1a        | Rot. 1b        | Rot. 1c        | Rot. 1d        | Rot. 1e        | Rot. 2a        | Rot. 2b        | Rot. 2c        | Rot. 2d        | Rot. 3         |
|--------------------------------------------|-----------------------------------------------------|----------------|-------------------|-------------------------------------|----------------|----------------|----------------|----------------|----------------|----------------|----------------|----------------|----------------|----------------|
| <b>Data collection</b>                     |                                                     |                |                   |                                     |                |                |                |                |                |                |                |                |                |                |
| Microscope                                 | Titan Krios                                         |                |                   |                                     |                |                |                |                |                |                |                |                |                |                |
| Voltage (kV)                               | 300                                                 |                |                   |                                     |                |                |                |                |                |                |                |                |                |                |
| Camera                                     | K2 Summit                                           |                |                   |                                     |                |                |                |                |                |                |                |                |                |                |
| Magnification                              | 165 kx                                              |                |                   |                                     |                |                |                |                |                |                |                |                |                |                |
| Exposure (e <sup>-</sup> /Å <sup>2</sup> ) | 33                                                  |                |                   |                                     |                |                |                |                |                |                |                |                |                |                |
| Defocus range (µm)                         | -1.6 to -3.2                                        |                |                   |                                     |                |                |                |                |                |                |                |                |                |                |
| Pixel size (Å)                             | 0.83                                                |                |                   |                                     |                |                |                |                |                |                |                |                |                |                |
| Movies collected                           | 5,199                                               |                |                   |                                     |                |                |                |                |                |                |                |                |                |                |
| Frames per movie                           | 20                                                  |                |                   |                                     |                |                |                |                |                |                |                |                |                |                |
| <b>Data processing</b>                     |                                                     |                |                   |                                     |                |                |                |                |                |                |                |                |                |                |
| Initial particles                          | 100,605 (C <sub>2</sub> symmetry-expanded: 201,210) |                |                   |                                     |                |                |                |                |                |                |                |                |                |                |
| Final no. particles                        | 100,605                                             | 118,683        | 201,210           | 36,925                              | 19,764         | 26,427         | 23,019         | 16,991         | 34,482         | 12,173         | 24,096         | 11,035         | 17,833         | 17,312         |
| Symmetry                                   | C <sub>2</sub>                                      | C <sub>1</sub> | C <sub>1</sub>    | C <sub>2</sub>                      | C <sub>1</sub> | C <sub>1</sub> | C <sub>1</sub> | C <sub>1</sub> | C <sub>1</sub> | C <sub>1</sub> | C <sub>1</sub> | C <sub>1</sub> | C <sub>1</sub> | C <sub>1</sub> |
| Map resolution (Å)                         | 2.7                                                 | 3.7            | 3.7               | 3.2                                 | 3.7            | 3.5            | 3.7            | 3.8            | 3.7            | 4.3            | 3.5            | 3.8            | 3.8            | 3.7            |
| Sharpening B factor                        | -46.2                                               | -74.4          | -92.5             | -49.8                               | -61.8          | -61.1          | -57.6          | -45.6          | -58.0          | -73.8          | -54.5          | -65.2          | -54.9          | -61.7          |
| <b>EMD ID</b>                              |                                                     |                |                   |                                     |                |                |                |                |                |                |                |                |                |                |
| <b>Model refinement statistics</b>         |                                                     |                |                   |                                     |                |                |                |                |                |                |                |                |                |                |
| CC (map/model)                             | 0.86                                                | 0.83           | 0.82              | 0.71                                | 0.79           | 0.79           | 0.82           | 0.79           | 0.69           | 0.71           | 0.81           | 0.77           | 0.77           | 0.79           |
| Resolution (map/model)                     | 2.65                                                | 3.4            | 3.68              | 3.13                                | 3.48           | 3.56           | 3.36           | 3.55           | 3.57           | 3.94           | 3.39           | 3.73           | 3.64           | 3.58           |
| No. of atoms                               | 76,690                                              | 19,669         | 12,083            | 251,552                             | 129,568        | 129,568        | 129,568        | 129,568        | 129,568        | 129,563        | 129,563        | 129,563        | 129,563        | 129,566        |
| No. of residues                            | 4074                                                | 1285           | 767               | 15,356                              | 7872           | 7872           | 7872           | 7872           | 7872           | 7872           | 7872           | 7872           | 7872           | 7872           |
| No. of lipids                              | 36                                                  | 0              | 0                 | 36                                  | 21             | 21             | 21             | 21             | 21             | 21             | 21             | 21             | 21             | 21             |
| No. of ATP/ADP                             | 0                                                   | 0              | 0                 | 10                                  | 5              | 5              | 5              | 5              | 5              | 5              | 5              | 5              | 5              | 5              |
| No. of Mg ions                             | 0                                                   | 0              | 0                 | 10                                  | 5              | 5              | 5              | 5              | 5              | 5              | 5              | 5              | 5              | 5              |
| <b>B-factor (Å<sup>2</sup>)</b>            |                                                     |                |                   |                                     |                |                |                |                |                |                |                |                |                |                |
| - protein                                  | 54.05                                               | 56.13          | 77.88             | 84.48                               | 55.65          | 70.37          | 80.22          | 83.27          | 70.70          | 112.72         | 79.93          | 65.52          | 66.49          | 101.5          |
| - ligands                                  | 50.57                                               | 58.25          | -                 | 69.94                               | 40.99          | 72.29          | 63.18          | 78.43          | 63.76          | 75.25          | 74.47          | 61.79          | 46.55          | 83.68          |
| Rotamer outliers (%)                       | 0.44                                                | 0.40           | 0.31              | 0.22                                | 0.42           | 0.09           | 0.18           | 0.26           | 0.58           | 0.18           | 0.27           | 0.48           | 0.42           | 0.39           |
| <b>Ramachandran (%)</b>                    |                                                     |                |                   |                                     |                |                |                |                |                |                |                |                |                |                |
| - outliers                                 | 0.00                                                | 0.00           | 0.00              | 0.01                                | 0.001          | 0.003          | 0.004          | 0.01           | 0.003          | 0.01           | 0.00           | 0.04           | 0.04           | 0.04           |
| - allowed                                  | 1.57                                                | 1.91           | 1.59              | 1.56                                | 1.52           | 1.65           | 1.44           | 1.49           | 1.49           | 1.67           | 1.58           | 1.47           | 1.65           | 1.79           |
| - favored                                  | 98.43                                               | 98.08          | 98.41             | 98.42                               | 98.47          | 98.34          | 98.56          | 98.49          | 98.48          | 98.31          | 98.42          | 98.49          | 98.31          | 98.17          |
| Clash score                                | 1.66                                                | 2.44           | 2.32              | 2.26                                | 2.60           | 2.65           | 2.53           | 2.67           | 2.99           | 2.38           | 2.30           | 2.52           | 2.38           | 3.57           |
| MolProbity score                           | 0.92                                                | 1.03           | 1.01              | 1.00                                | 1.05           | 1.05           | 1.04           | 1.05           | 1.09           | 1.02           | 1.01           | 1.04           | 1.02           | 1.15           |
| <b>RMSD</b>                                |                                                     |                |                   |                                     |                |                |                |                |                |                |                |                |                |                |
| - bonds (Å)                                | 0.004                                               | 0.004          | 0.02              | 0.003                               | 0.003          | 0.003          | 0.004          | 0.003          | 0.003          | 0.002          | 0.003          | 0.003          | 0.003          | 0.003          |
| - angles (°)                               | 0.455                                               | 0.416          | 0.386             | 0.407                               | 0.414          | 0.424          | 0.417          | 0.407          | 0.412          | 0.410          | 0.416          | 0.419          | 0.428          | 0.421          |
| EMRinger score                             | 5.11                                                | 3.96           | 1.61              | 2.56                                | 3.24           | 2.95           | 3.32           | 2.85           | 3.32           | 1.35           | 2.89           | 2.32           | 2.49           | 2.8            |
| <b>PDB ID</b>                              |                                                     |                |                   |                                     |                |                |                |                |                |                |                |                |                |                |

779

780

781 **Supplementary Table 2. Composition of *T. brucei* ATP synthase dimer**

| Subunit name                    | TriTrypDB Lister strain 427 ID                        | TriTrypDB TREU927 strain ID                    | Uniprot TREU927 strain ID | Residues | Residues built     |
|---------------------------------|-------------------------------------------------------|------------------------------------------------|---------------------------|----------|--------------------|
| <b>F<sub>1</sub> subcomplex</b> |                                                       |                                                |                           |          |                    |
| <b><math>\alpha</math></b>      | Tb427_070081800<br>Tb427_070081900                    | Tb927.7.7420<br>Tb927.7.7430                   | Q57TX9                    | 584      | 45-151,<br>161-584 |
| <b><math>\beta</math></b>       | Tb427_030013500                                       | Tb927.3.1380                                   | Q57XX1                    | 519      | 26-514             |
| <b><math>\gamma</math></b>      | Tb427_100005200                                       | Tb927.10.180                                   | B0Z0F6                    | 305      | 2-301              |
| <b><math>\delta</math></b>      | Tb427_060054900                                       | Tb927.6.4990                                   | Q586H1                    | 182      | 22-182             |
| <b><math>\epsilon</math></b>    | Tb427_100054600                                       | Tb427.10.5050                                  | N/A                       | 75       | 11-75              |
| <b>p18</b>                      | Tb427_050022900                                       | Tb927.5.1710                                   | Q57ZP0                    | 188      | 23-188             |
| <b>F<sub>0</sub> subcomplex</b> |                                                       |                                                |                           |          |                    |
| <b>OSCP</b>                     | Tb427_100087100                                       | Tb927.10.8030                                  | Q38AG1                    | 255      | 18-202,<br>208-255 |
| <b><i>a</i></b>                 | mt encoded                                            | mt encoded                                     | N/A                       | 231      | 1-231              |
| <b><i>c</i></b>                 | Tb427_100018700<br>Tb427_110057900<br>Tb427_070019000 | Tb927.10.1570<br>Tb927.11.5280<br>Tb927.7.1470 | Q38C84 Q385P0<br>Q57WQ3   | 118      | 41-118             |
| <b><i>d</i></b>                 | Tb427_050035800                                       | Tb927.5.2930                                   | Q57ZW9                    | 370      | 17-325,<br>332-354 |
| <b><i>e</i></b>                 | Tb427_110010200                                       | Tb927.11.600                                   | N/A                       | 92       | 1-383              |
| <b><i>f</i></b>                 | Tb427_030016600                                       | Tb927.3.1690                                   | Q57ZE2                    | 145      | 2-136              |
| <b><i>g</i></b>                 | Tb427_020016900                                       | Tb927.2.3610                                   | Q586X8                    | 144      | 16-144             |
| <b><i>i/j</i></b>               | Tb427_030029400                                       | Tb927.3.2880                                   | Q57ZM4                    | 104      | 2-104              |
| <b><i>k</i></b>                 | Tb427_070011800                                       | Tb927.7.840                                    | Q57VT0                    | 124      | 20-124             |
| <b><math>\delta</math></b>      | Tb427_040037300                                       | Tb927.4.3450                                   | Q585K5                    | 114      | 29-114             |
| <b>ATBTB1</b>                   | Tb427_100008400                                       | Tb927.10.520                                   | Q38CI8                    | 396      | 1-383              |
| <b>ATPTB3</b>                   | Tb427_110067400                                       | Tb927.11.6250                                  | Q385E4                    | 269      | 2-269              |
| <b>ATPTB4</b>                   | Tb427_100105100                                       | Tb927.10.9830                                  | Q389Z3                    | 157      | 21-157             |
| <b>ATPTB6</b>                   | Tb427_110017200                                       | Tb927.11.1270                                  | Q387C5                    | 169      | 2-169              |
| <b>ATPTB11</b>                  | Tb427_030021500                                       | Tb927.3.2180                                   | Q582T1                    | 156      | 18-156             |
| <b>ATPTB12</b>                  | Tb427_050037400                                       | Tb927.5.3090                                   | Q57Z84                    | 101      | 5-100              |
| <b>ATPTB14</b>                  | Tb427_040009100                                       | Tb927.4.720                                    | Q580A0                    | 105      | 26-105             |
| <b>ATPEG3</b>                   | Tb427_060009300                                       | Tb927.6.590                                    | Q583U4                    | 98       | 14-98              |
| <b>ATPEG4</b>                   | N/A                                                   | Tb927.11.2245                                  | N/A                       | 62       | 1-62               |

782

783

784 **Supplementary Table 3. List of oligonucleotides**

| Subunit                                                  | Primer pair sequences                                                           |
|----------------------------------------------------------|---------------------------------------------------------------------------------|
| <b>Primers for amplification of RNAi cassettes</b>       |                                                                                 |
| <i>e</i>                                                 | TAATCTCGAGGGTACCGGGAGTACAGAAGGGCTACA<br>TAGATCTAGAGGATCCCGTGCACACCATCAGCTG      |
| <i>f</i>                                                 | ATACTCGAGGGTACCGTGAGTACCGCCTTTACGC<br>GCGTCTAGAGGATCCAGCACTGATCACCAAACCTGC      |
| <i>g</i>                                                 | ACTGCTCGAGGGTACCACGCGGGAATTCAAAGACC<br>GCGGTCTAGAGGATCCCGTTGCGGTGCTTGTCATTA     |
| <i>i/j</i>                                               | TAATCTCGAGGGTACCGAATATCCGATGCATGCCGC<br>GCCGTCTAGAGGATCCACTTCGCTCTACTGCATGCA    |
| <i>k</i>                                                 | ATTACTCGAGCCC GGGCGATCAGTGCAGGGGATTTT<br>GCCGTCTAGAGGATCCTTTCCTCGAAAACGCACACA   |
| <b>8</b>                                                 | ATGACTCGAGGGTACCGGGCTATGGTGTGGTATTATGC<br>GACGTCTAGAGGATCCGCAGAAAACCTCCCAACGACA |
| <b>ATPTB3</b>                                            | ACTGCTCGAGGGTACCAAAGAGGAGGTGAGGTCTGC<br>GCAGTCTAGAGGATCCCCCTAGGGTTCTTCGAAGCA    |
| <b>ATPTB4</b>                                            | CTGACTCGAGGGTACCTTCCTTTTCTGCTGCATCGG<br>GCAGTCTAGAGGATCCCTCCTCGGGCTTCCAATTTG    |
| <b>ATPTB6</b>                                            | ACTGCTCGAGGGTACCCAACATGGCAGTATCCGGTG<br>GCAGTCTAGAGGATCCTTATTAGTGGCGGTGGTGGT    |
| <b>ATPTB11</b>                                           | ACTGCTCGAGGGTACCGCGCTCGTCTTCTCCATTTT<br>GCAGAAGCTTGGATCCAGGTTGGGGTGTTTAGGGAG    |
| <b>ATPTB12</b>                                           | TAATCTCGAGGGTACCGACGCCATCAAAGGAATGCC<br>GCCGTCTAGAGGATCCAGCAGCCAACAAACAGACAA    |
| <b>ATPTB14</b>                                           | TAATCTCGAGGGTACCGTTGAGTGAGGAGGAACGGG<br>GCAGTCTAGAGGATCCTATCCCTTCCACCACCACT     |
| <b>ATPEG3</b>                                            | TACACTCGAGGGTACCAAACCTGAAGGCCCTCACAC<br>GCAGTCTAGAGGATCCCTCTTTCTGTCGCGCTGATA    |
| <b>Primers for quantification of mRNA levels by qPCR</b> |                                                                                 |
| <i>e</i>                                                 | CAAGCCTTGCACACACTTTATG<br>CCGCAAAGAAGTACGCCAC                                   |
| <i>f</i>                                                 | TTTTCTACATACCGCAGCAGT<br>TACCATTCCATGCGCGTTG                                    |
| <i>g</i>                                                 | GCAATTGTGTGAGCTGAACG<br>TACTGGCCGCATTGCATAAC                                    |
| <i>i/j</i>                                               | AGAGTAAAAGCGCGCCTACG<br>CAGTTGGAAAACCGGTAGCC                                    |
| <i>k</i>                                                 | ACACAAAACACTTCCAGCAGA                                                           |

|                |                                               |
|----------------|-----------------------------------------------|
|                | CGCTATGACGGACAGGTGT                           |
| <b>8</b>       | GCTACGGCGACTTGGTGC<br>CGTCACCGCGTATTTGTTCA    |
| <b>ATPTB3</b>  | AACGTTTATATCAGCGGGCG<br>CTGTTTTGGTCTGCACACGA  |
| <b>ATPTB4</b>  | CCAAACTTTGAAGCAGCGGA<br>ATTCCTTGGATCCGCACCTT  |
| <b>ATPTB6</b>  | TCGGCATAGGAGAAGTAACGA<br>GATTCGGTTTGGAAGTTGCG |
| <b>ATPTB11</b> | CAACGGCCCCACATTCTC<br>ACACCGCGGTCATTCATTG     |
| <b>ATPTB12</b> | GCACTTCATTCTCCCGACTG<br>ACATGATGTAACACCTCCGC  |
| <b>ATPTB14</b> | CCAAGAGTGATGATGGCCCC<br>CGTTTAGGGTCGCGGAAAAC  |
| <b>ATPEG3</b>  | TGGCCCCACATGACTGAAAA<br>GGAAGTGATCCGCCGGATT   |

785

786

787

788

789

790

791

792

793

794

795

796

797

798

799

800

801

802

803



804 **Supplementary Table 4. List of antibodies used in this study**

| <b>Target</b>                             | <b>Type</b>       | <b>Reference</b> | <b>Dilution SDS-PAGE</b> | <b>Dilution BN-PAGE</b> |
|-------------------------------------------|-------------------|------------------|--------------------------|-------------------------|
| <b>Primary antibodies</b>                 |                   |                  |                          |                         |
| <b>subunit-<math>\beta</math></b>         | rabbit polyclonal | 1                | 1:2000                   | 1:2000                  |
| <b>p18</b>                                | rabbit polyclonal | 1                | 1:1000                   | -                       |
| <b>ATPTB1</b>                             | rabbit polyclonal | 1                | 1:1000                   | 1:1000                  |
| <b>subunit-<i>d</i></b>                   | rabbit polyclonal | 1                | 1:1000                   | 1:500                   |
| <b>mtHsp70</b>                            | mouse monoclonal  | 2                | 1:5000                   | -                       |
| <b>Secondary antibodies</b>               |                   |                  |                          |                         |
| <b>goat anti-rabbit IgG HRP conjugate</b> |                   | BioRad 1721019   | 1:2000                   | 1:2000                  |
| <b>goat anti-mouse IgG HRP conjugate</b>  |                   | BioRad 1721011   | 1:2000                   | 1:2000                  |

805

806 **Supplementary Figures:**

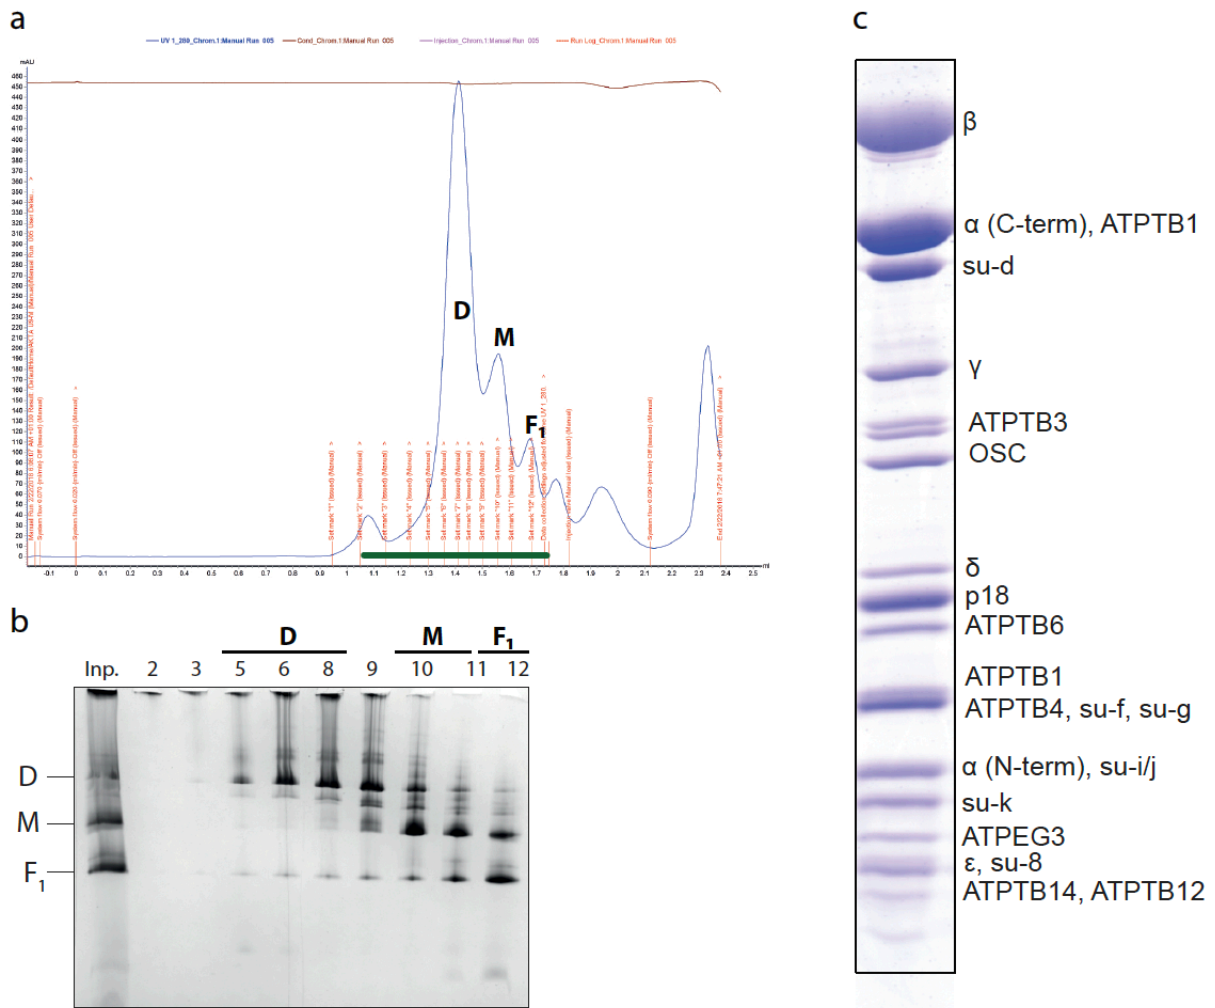

807

808 **Supplementary figure 1: Purification of the *T. brucei* ATP synthase dimer.** **a**, Size  
 809 exclusion chromatography trace with peaks enriched with ATP synthase dimers (D), monomers  
 810 (M) and F<sub>1</sub>-ATPase (F<sub>1</sub>) labelled. **b**, Fractions from size exclusion chromatography marked  
 811 with green bar in (a) resolved by native BN-PAGE. **c**, Dimer-enriched fraction resolved by  
 812 SDS-PAGE stained by Coomassie blue dye. Bands are annotated based on mass spectrometry  
 813 identification from excised gel pieces.

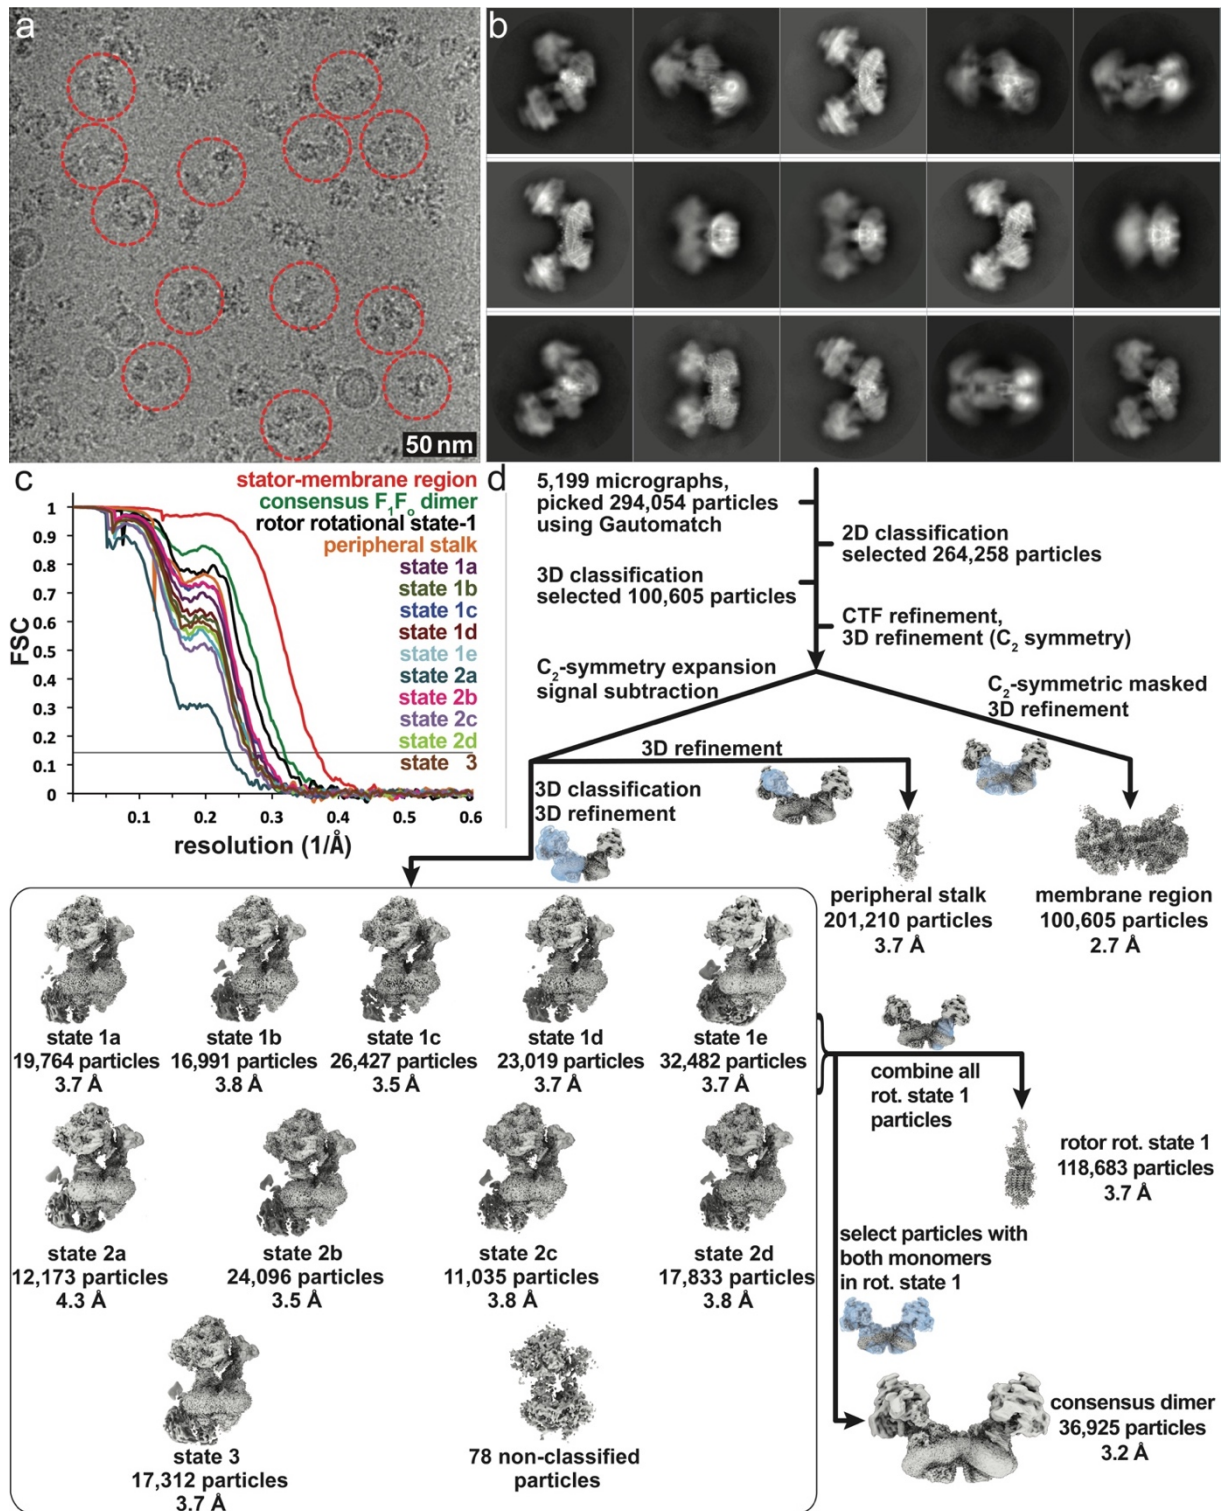

814

815 **Supplementary figure 2: Cryo-EM data processing of the *T. brucei* ATP synthase dimer.**  
 816 **a**, Representative micrograph. **b**, 2D class averages. **c**, Fourier Shell Correlation (FSC) curves  
 817 showing the estimated resolutions of ATP synthase maps according to the gold standard 0.143  
 818 criterion. **d**, Data processing scheme resulting in maps covering all regions of the complex, as  
 819 well as 10 rotational states.

820

821

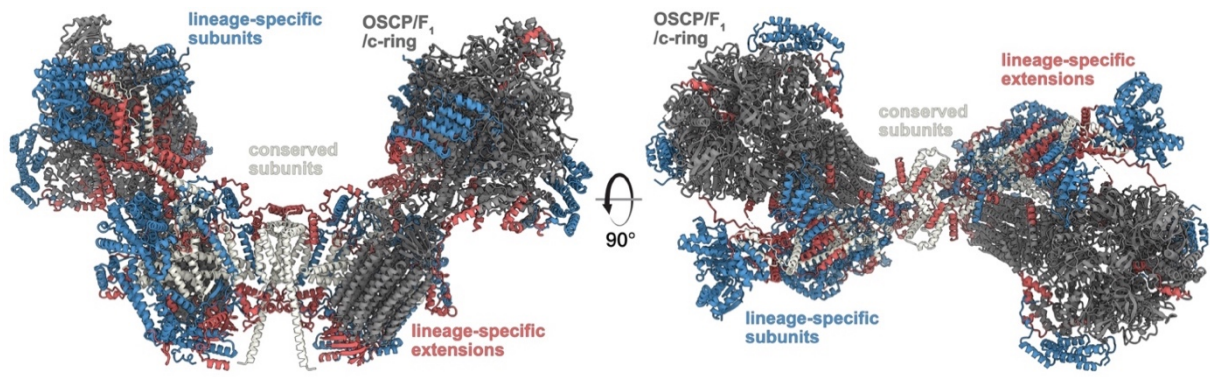

822

823 **Supplementary figure 3: Conserved and phylum specific elements generate the *T. brucei***  
824 **ATP synthase architecture.** The canonical OSCP/F<sub>1</sub>/c-ring monomers (dark grey) are tied  
825 together by both conserved F<sub>o</sub> subunits and extensions of lineage-specific subunits (red). The  
826 F<sub>o</sub> periphery and peripheral stalk attachment are composed of lineage specific subunits (blue).



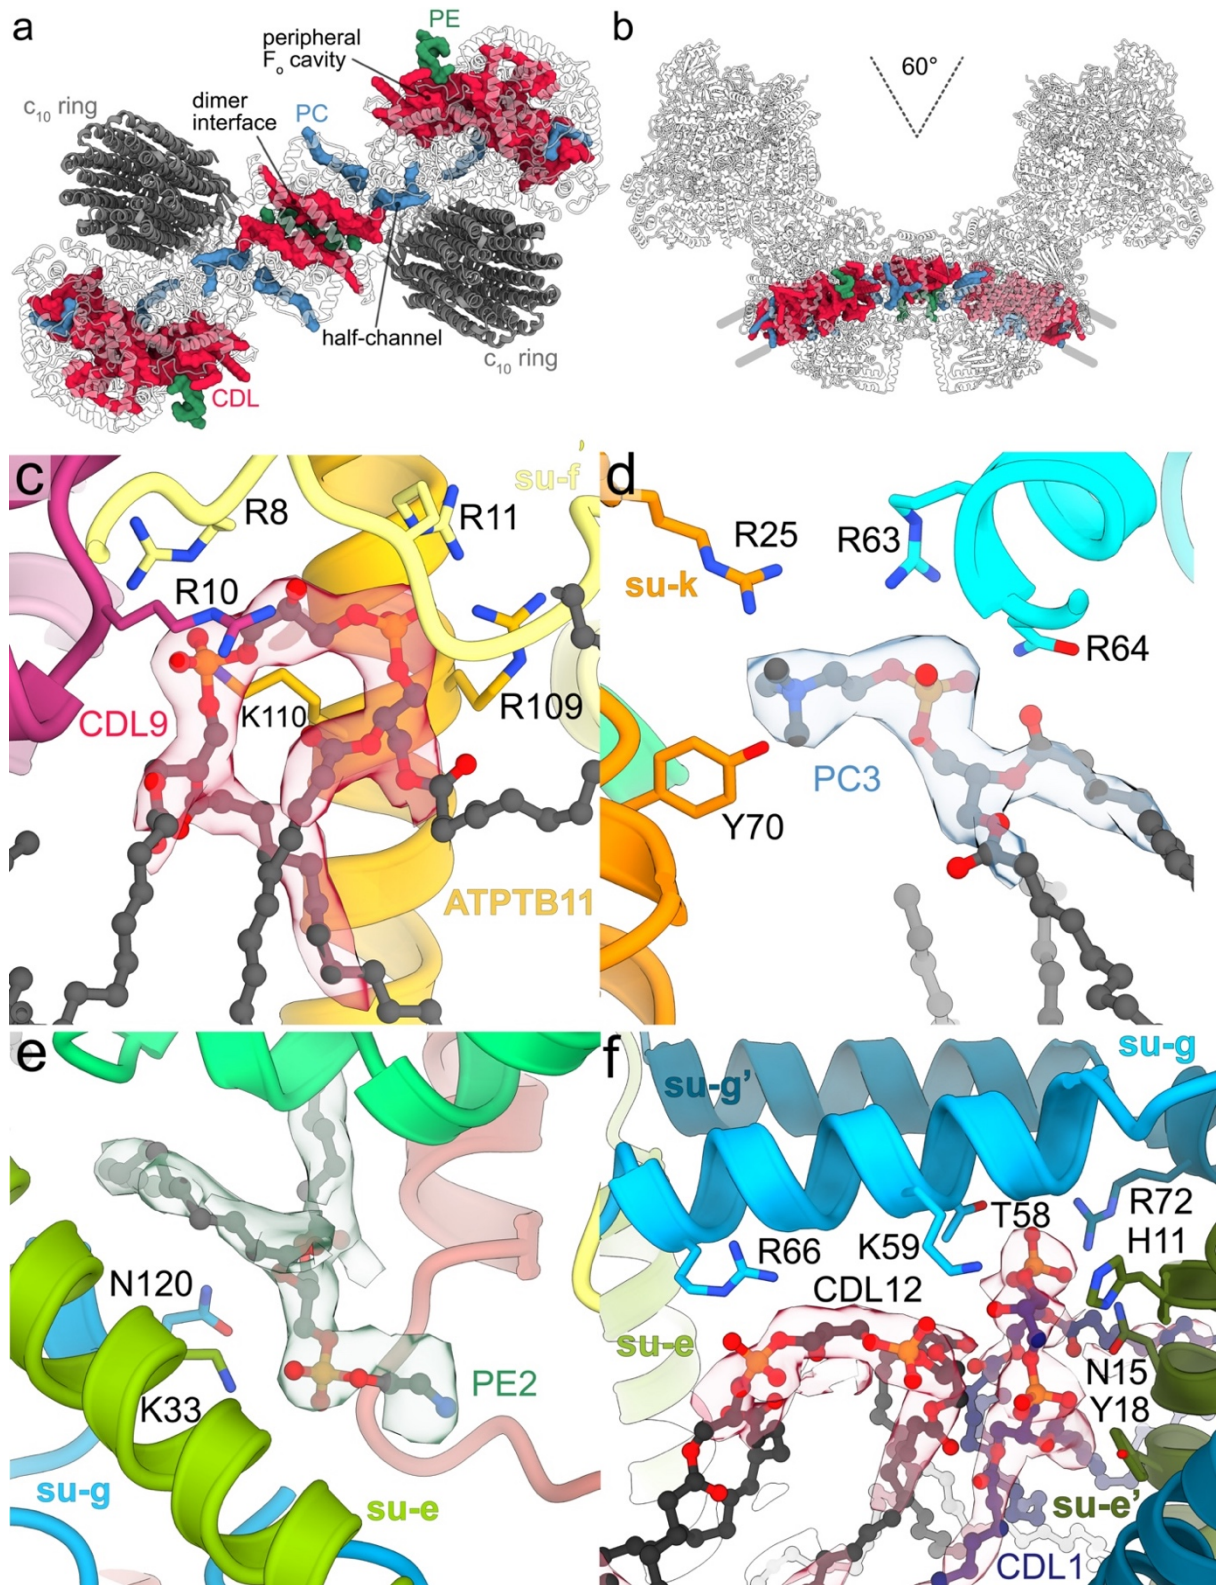

827

828 **Supplementary figure 4: The  $F_o$  region coordinates numerous bound lipids.** **a**,  $F_o$  top view,  
829 cardiolipin (CDL), phosphatidylcholine (PC) and phosphatidylethanolamine (PE) are bound at  
830 the dimer interface, the luminal proton half-channel and the peripheral  $F_o$  cavity. **b**, The 60°-  
831 dimer angle generates a curved  $F_o$  region with phospholipids bound in an arc-shaped bilayer.  
832 **c-f**, Bound lipids with cryo-EM density and coordinating residues.

833

834

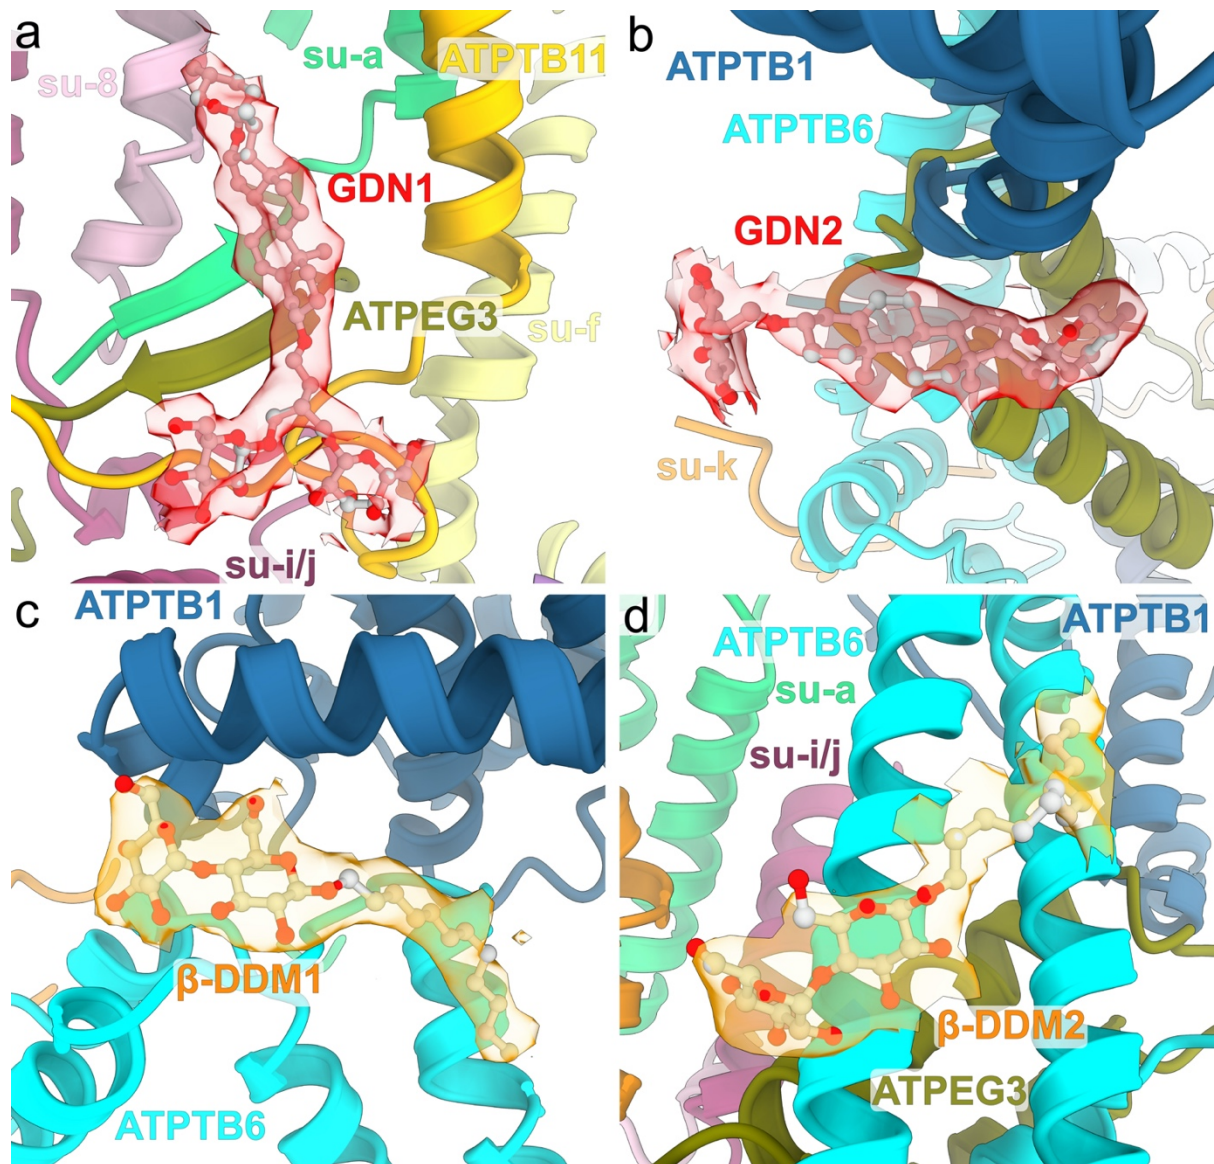

835

836 **Supplementary figure 5: Bound detergents of the F<sub>0</sub> region.** GDN (a,b) and  $\beta$ -DDM (c,d)

837 molecules bound in the periphery of the membrane region with cryo-EM map densities shown

838 (transparent), indicating that both glycosides are retained in the detergent micelle.

839



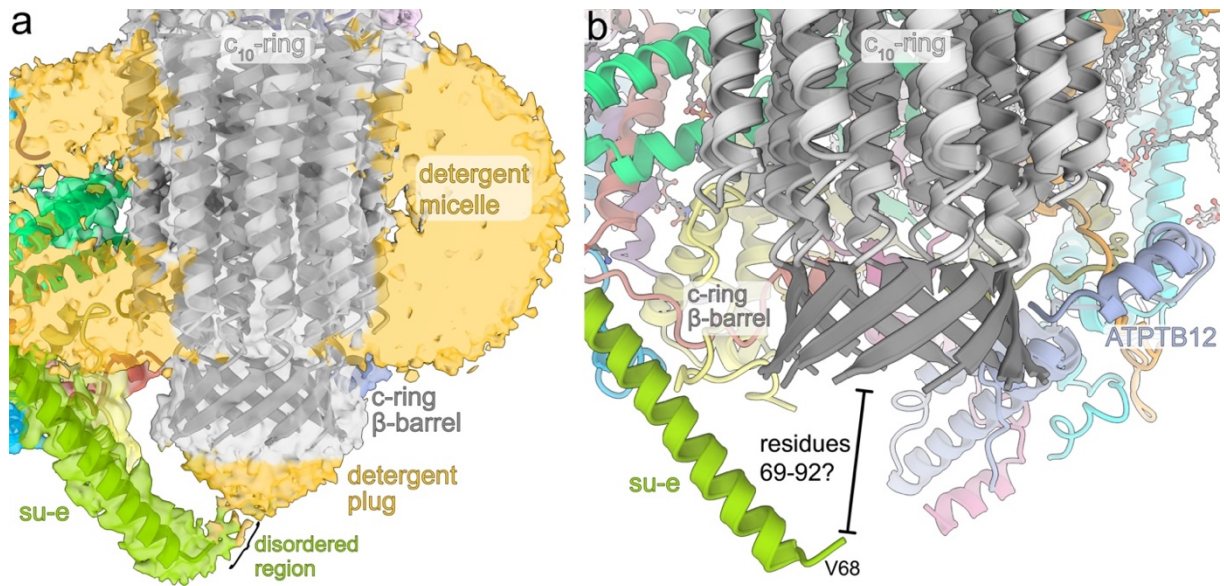

840

841 **Supplementary figure 6. The C-terminal tail of subunit-*e* interacts with the  $c_{10}$ -ring. **a**,**  
842 The cryo-EM map reveals disordered detergent density of the detergent belt surrounding the  
843 membrane region as well as a detergent plug on the luminal side of the *c*-ring. **b**, The helical  
844 C-terminus of subunit-*e* extends into the lumen towards the *c*-ring. The terminal 23 residues  
845 are disordered and likely interact with the  $\beta$ -barrel.

846

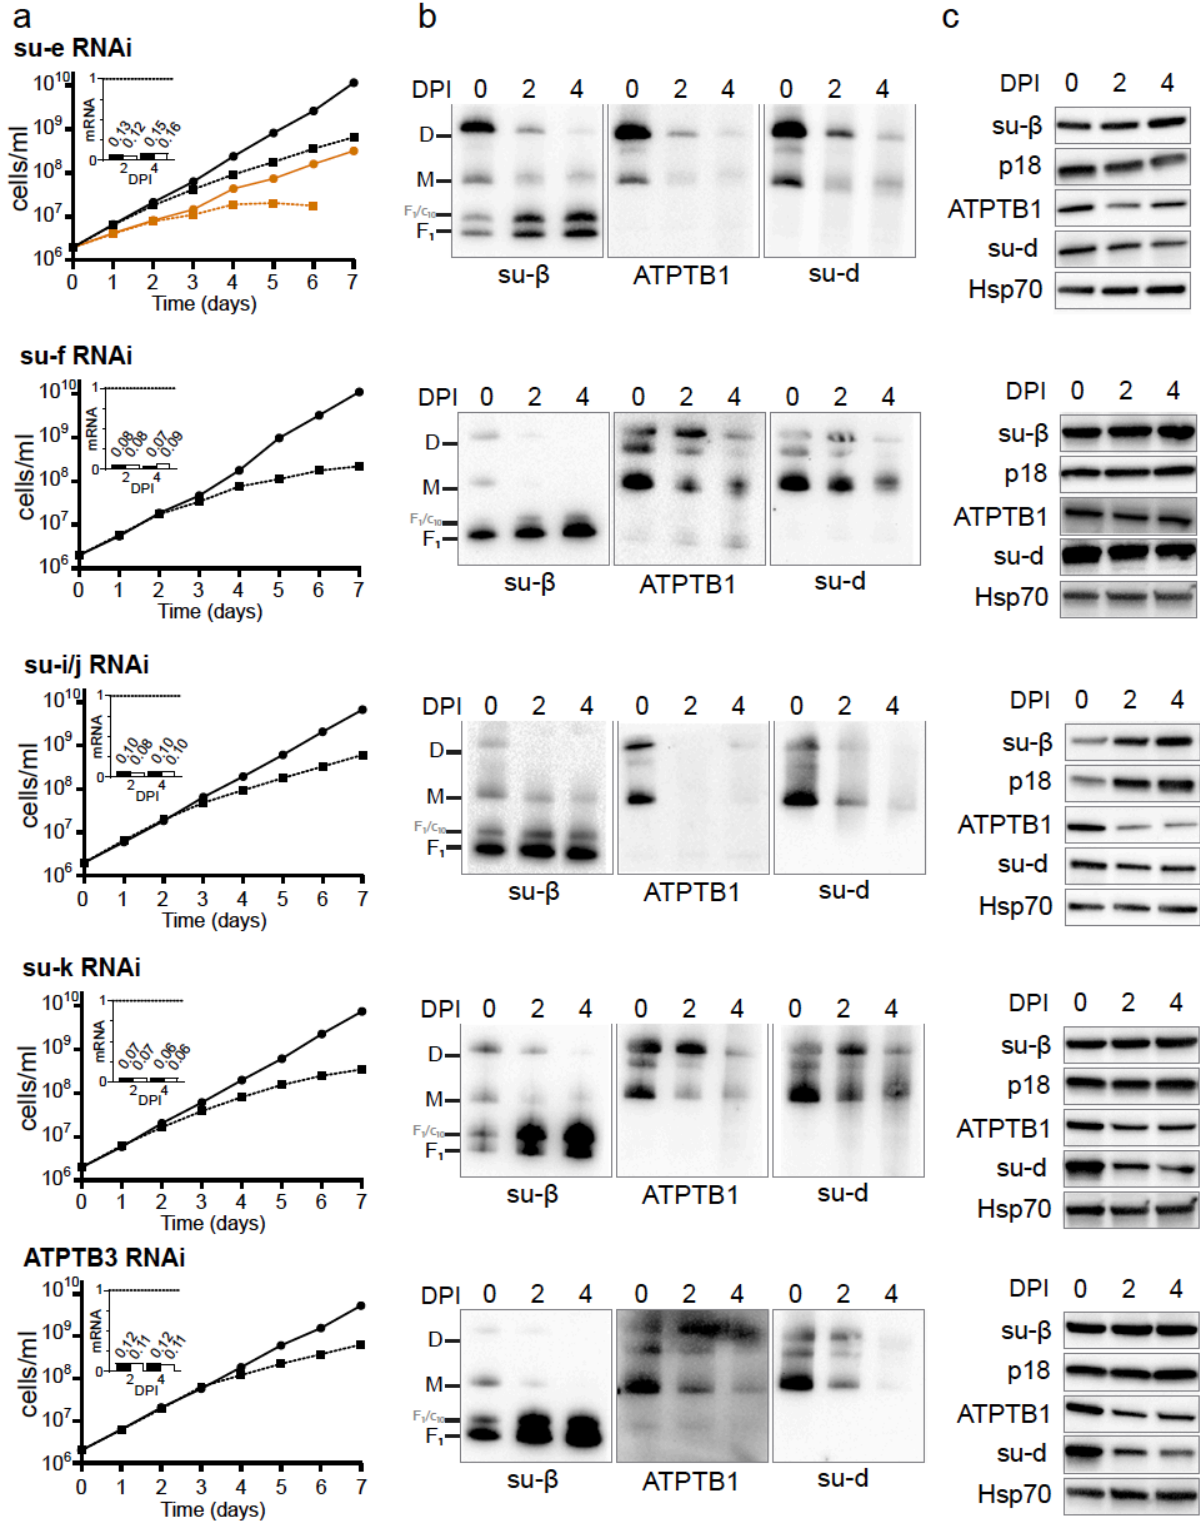

847



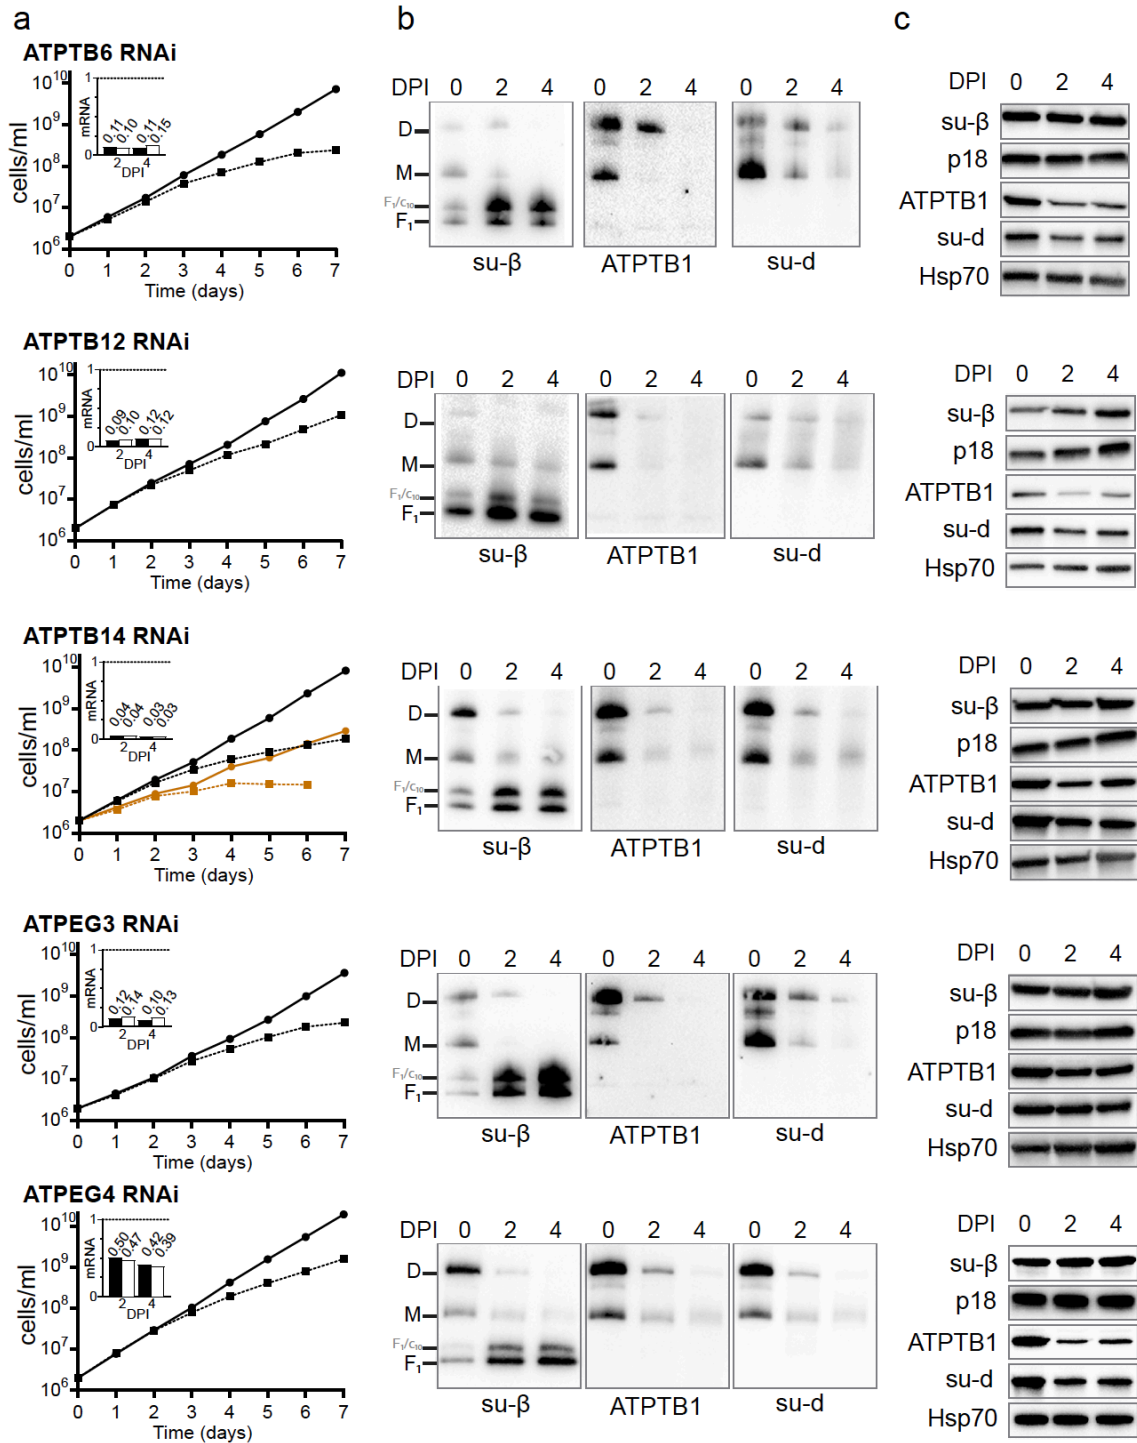

848

849 **Supplementary figure 7. Effects of RNAi knock-down of ATP synthase subunits on**  
 850 **viability and stability and dimerization of ATP synthase. a**, Growth curves of indicated  
 851 non-induced (solid lines) and tetracycline induced (dashed lines) RNAi cells lines in the  
 852 presence (black) or absence (brown) of glucose. The insets show relative levels of the  
 853 respective target mRNA at indicated days post induction (DPI) normalized to the levels of 18S  
 854 rRNA (black bars) or  $\beta$ -tubulin (white bars). **b**, Immunoblots of mitochondrial lysates from  
 855 indicated RNAi cell lines resolved by BN-PAGE probed by antibodies against indicated ATP  
 856 synthase subunits. **c**, Immunoblots of whole cell lysates from indicated RNAi cell lines probed  
 857 with indicated antibodies.

858

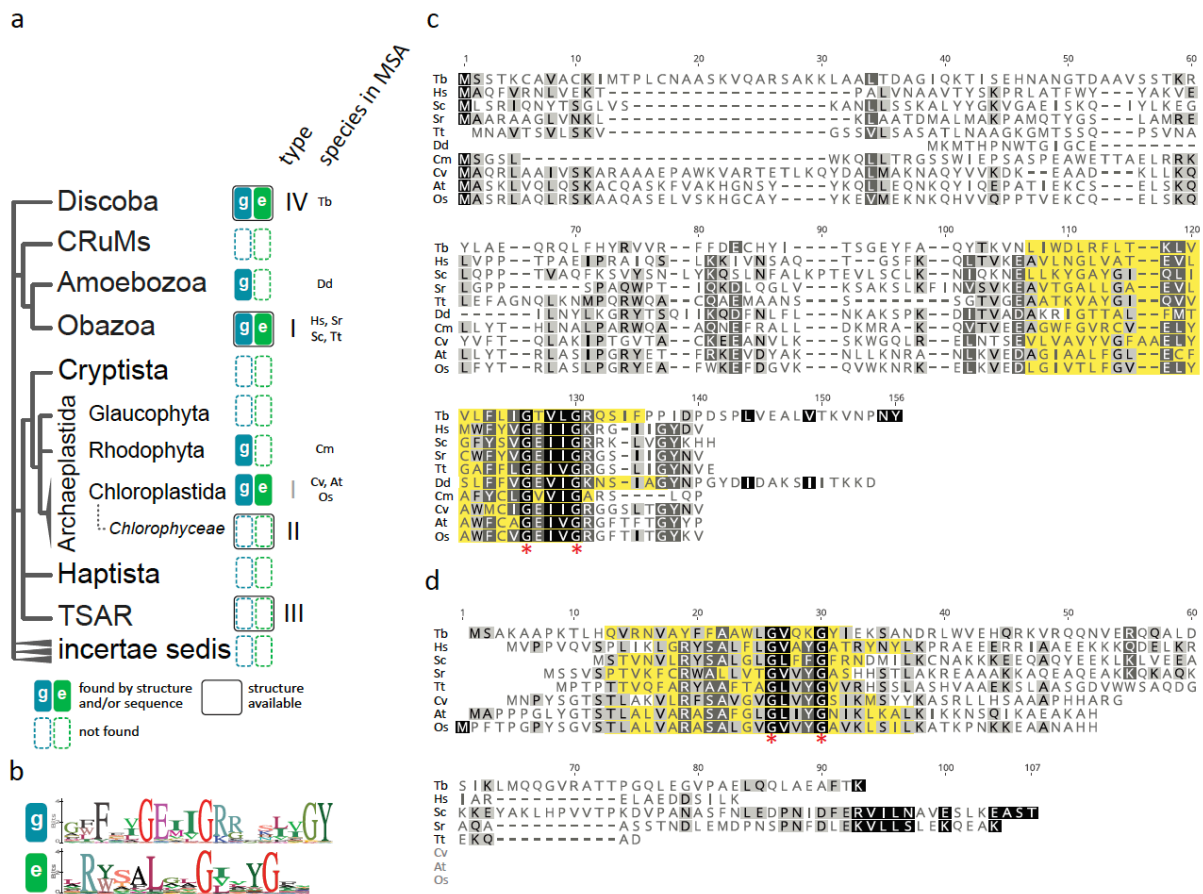

859

860 **Supplementary figure 8: Phylogenetic distribution and sequence conservancy of subunits**

861 **e and g. a**, Distribution of subunits e and g mapped on the phylogenetic tree of eukaryotes<sup>3</sup>.

862 Homologs of subunits e and g were searched in non-redundant GenBank and UniprotKB

863 protein databases by PSI-BLAST, and phmmer and hmmsearch<sup>4</sup>, respectively, using individual

864 sequences of representatives from *H. sapiens* and *T. brucei*, and in the case of hmmsearch a

865 multiple sequence alignment (MSA) of representatives from *Homo sapiens*, *Saccharomyces*

866 *cerevisiae*, *Arabidopsis thaliana* and *T. brucei*, as queries. Groups, in which at least one

867 structure of ATP synthase is available, are marked. Abbreviations of species used in MSA in

868 panels (c) and (d) are shown. **b**, Sequence logo of GXXXG motifs and flanking regions of

869 subunits e and g. Hits from hmmsearch were clustered by CD-HIT Suite<sup>5</sup> to 50% sequence

870 identity and MSA of representative sequences of each cluster was generated by Clustal

871 Omega<sup>6</sup>. The sequence logos were created from MSA in Geneious Prime (Biomatters Ltd.).

872 **c,d**, MSA of sequences of subunits g (c) and e (d) from species representing major groups

873 shown in (a) generated by MUSCLE<sup>7</sup> and visualized in Geneious Prime. The experimentally

874 determined or predicted transmembrane regions are highlighted in yellow. Species

875 abbreviations: Tb – *T. brucei*, Hs – *H. sapiens*, Sc – *S. cerevisiae*, Sr – *Salpingoeca rosetta*, Tt

876 – *Thecamonas trahens*, Dd – *Dictyostelium discoideum*, Cm – *Cyanidioschyzon merolae*, Cv

877 – *Chlorella vulgaris*, At – *Arabidopsis thaliana*, Os – *Oryza sativa*.

878

879

880 **Supplementary references:**

- 881 1. Subrtova, K., Panicucci, B. & Zikova, A. ATPaseTb2, a unique membrane-bound FoF1-  
882 ATPase component, is essential in bloodstream and dyskinetoplastic trypanosomes. *PLoS*  
883 *Pathog* **11**, e1004660 (2015).
- 884 2. Panigrahi, A.K. et al. Mitochondrial complexes in *Trypanosoma brucei*: a novel complex  
885 and a unique oxidoreductase complex. *Mol Cell Proteomics* **7**, 534-45 (2008).
- 886 3. Burki, F., Roger, A.J., Brown, M.W. & Simpson, A.G.B. The New Tree of Eukaryotes.  
887 *Trends Ecol Evol* **35**, 43-55 (2020).
- 888 4. Protein Sequence Similarity Search. *Curr Protoc Bioinformatics* **60**, 3 15 1-3 15 23 (2017).
- 889 5. Huang, Y., Niu, B., Gao, Y., Fu, L. & Li, W. CD-HIT Suite: a web server for clustering and  
890 comparing biological sequences. *Bioinformatics* **26**, 680-2 (2010).
- 891 6. Sievers, F. et al. Fast, scalable generation of high-quality protein multiple sequence  
892 alignments using Clustal Omega. *Mol Syst Biol* **7**, 539 (2011).
- 893 7. Edgar, R.C. MUSCLE: multiple sequence alignment with high accuracy and high  
894 throughput. *Nucleic Acids Res* **32**, 1792-7 (2004).
